# Supplementary material for: Feeding ecology and sexual dimorphism in a speciose flower beetle clade (Hopliini: Scarabaeidae)
Source: PeerJ. 2018 Jun 20;6:e4632. doi: 10.7717/peerj.4632 (PMC6015485; doi:10.7717/peerj.4632)
Supplement: Supplemental Information 3 — Raw data–Calculation of scaling relationships for male hind leg lengths and thicknesses for 37 species (minimum of 20 individuals per species). [file peerj-06-4632-s003.xlsx]

## Sheet: emb_vs_non_emb_slop_tests_FOR_R
Table S2. Raw data - Calculation of scaling relationships for male hind leg lengths and thicknesses for 37 species (minimum of 20 individuals per species).
Taxon	Guild	Body Length (mm)	Femur Length (mm)	Tibia Length (mm)	Tarsus Length (mm)	Leg length (mm)	Femur thickness (mm)	Tibia thickness (mm)
Denticnema decemlineata	embedder	11.63	6.12	5.46	5.93	17.51	3.81	2.66
Denticnema decemlineata	embedder	11.62	5.93	4.96	6.39	17.28	3.3	2.32
Denticnema decemlineata	embedder	12.16	7.17	5.29	7.36	19.82	3.54	2.59
Denticnema decemlineata	embedder	11.19	6.73	5	5.28	17.01	2.97	2.1
Denticnema decemlineata	embedder	11.17	5.92	5.19	6.5	17.61	3.76	2.39
Denticnema decemlineata	embedder	12.15	6.58	5.69	7.28	19.55	3.65	2.4
Denticnema decemlineata	embedder	11.02	6.11	5.15	6.11	17.37	2.81	2.1
Denticnema decemlineata	embedder	12.13	6.01	5.5	6.1	17.61	3.35	2.41
Denticnema decemlineata	embedder	12.06	6.65	5.16	7	18.81	3.12	2.39
Denticnema decemlineata	embedder	12.36	7.15	5.93	6.31	19.39	3.96	2.61
Denticnema decemlineata	embedder	11.98	6.92	5.83	6.1	18.85	3.93	2.51
Denticnema decemlineata	embedder	12.24	6.89	5.32	7.67	19.88	3.91	2.45
Denticnema decemlineata	embedder	11.02	5.29	4.94	5.22	15.45	3.12	2.18
Denticnema decemlineata	embedder	11.37	5.56	5.32	6.12	17	3.17	2.25
Denticnema decemlineata	embedder	11.8	6.43	5.48	7.44	19.35	3.27	2.15
Denticnema decemlineata	embedder	11.81	6.42	5.26	6.4	18.08	3.58	2.41
Denticnema decemlineata	embedder	12.46	6.87	5.76	6.73	19.36	3.42	2.33
Denticnema decemlineata	embedder	10.91	6.33	4.8	5.34	16.47	2.7	2
Denticnema decemlineata	embedder	11.75	5.91	5.03	6.25	17.19	2.9	2.08
Denticnema decemlineata	embedder	12.89	7.23	5.48	8.13	20.84	3.89	2.67
Denticnema decemlineata	embedder	11.47	6.1	5.56	6.06	17.72	3.24	2.23
Denticnema decemlineata	embedder	11.08	6.72	4.84	6.06	17.62	3.1	2.06
Denticnema decemlineata	embedder	10.66	6.39	4.62	5.95	16.96	2.59	1.87
Denticnema decemlineata	embedder	11.76	7.05	5.83	6.08	18.96	3.2	2.35
Denticnema decemlineata	embedder	11.59	5.81	5.31	6.18	17.3	2.86	2.19
Denticnema decemlineata	embedder	12.53	6.94	5.73	7.41	20.08	4.19	2.51
Denticnema decemlineata	embedder	11.92	6.38	5.5	6.67	18.55	3.79	2.27
Denticnema decemlineata	embedder	10.96	5.61	5.21	5.54	16.36	3.54	1.99
Denticnema decemlineata	embedder	11.85	7.23	5.55	6.48	19.26	3.33	2.36
Denticnema decemlineata	embedder	12.63	6.15	6	6.66	18.81	3.76	2.06
Denticnema morbillosa	embedder	8.38	4.4	3.81	4.04	12.25	1.93	1.34
Denticnema morbillosa	embedder	8.91	4.36	4.25	4.15	12.76	1.95	1.29
Denticnema morbillosa	embedder	9.08	4.29	3.72	4.28	12.29	2.26	1.56
Denticnema morbillosa	embedder	8.27	3.83	3.86	3.9	11.59	1.78	1.3
Denticnema morbillosa	embedder	8.59	3.83	3.59	3.2	10.62	1.74	1.25
Denticnema morbillosa	embedder	9.3	4.64	4.16	4.18	12.98	2.43	1.61
Denticnema morbillosa	embedder	8.45	3.9	3.92	3.53	11.35	2	1.33
Denticnema morbillosa	embedder	9.34	4.37	4	3.84	12.21	2.34	1.49
Denticnema morbillosa	embedder	8.94	4.23	4.68	4.21	13.12	2.24	1.37
Denticnema morbillosa	embedder	8.46	4.59	3.96	4.17	12.72	2.3	1.62
Denticnema morbillosa	embedder	7.69	3.46	3.96	3.71	11.13	1.71	1.38
Denticnema morbillosa	embedder	8.67	4.14	4.23	4.05	12.42	2.06	1.38
Denticnema morbillosa	embedder	9.2	4.21	4.2	3.9	12.31	2.13	1.41
Denticnema morbillosa	embedder	9.19	3.89	3.85	3.87	11.61	2.19	1.24
Denticnema morbillosa	embedder	9.28	4.25	4.2	4.49	12.94	2.2	1.56
Denticnema morbillosa	embedder	9.2	4.57	4.51	4.51	13.59	2.27	1.44
Denticnema morbillosa	embedder	9.23	4.35	4.14	4.06	12.55	2.04	1.39
Denticnema morbillosa	embedder	7.64	3.56	3.38	3.23	10.17	1.66	1.14
Denticnema morbillosa	embedder	8.43	4.07	3.92	3.64	11.63	1.65	1.2
Denticnema morbillosa	embedder	8.4	4.31	4.14	3.59	12.04	2.17	1.43
Denticnema morbillosa	embedder	8.98	3.9	4.4	3.89	12.19	2.15	1.51
Denticnema morbillosa	embedder	9	4.36	4.02	3.8	12.18	2.03	1.32
Denticnema morbillosa	embedder	8.39	3.99	4.01	4.32	12.32	2.22	1.55
Denticnema morbillosa	embedder	9.29	4.64	4.49	4.38	13.51	2.31	1.54
Denticnema morbillosa	embedder	8.8	4.15	4.02	4.02	12.19	2.28	1.48
Denticnema morbillosa	embedder	8.62	4.43	4	3.51	11.94	1.91	1.38
Denticnema morbillosa	embedder	8.67	3.88	4.17	4.04	12.09	1.99	1.38
Denticnema morbillosa	embedder	9.28	4.54	4.56	4.61	13.71	2.31	1.81
Denticnema morbillosa	embedder	9.14	4.35	4.54	4.53	13.42	2.18	1.63
Denticnema morbillosa	embedder	9.51	4.92	4.1	4.45	13.47	2.44	1.74
Denticnema striata	embedder	14.08	7.1	5.56	7.5	20.16	4.42	2.36
Denticnema striata	embedder	12.68	6.97	4.66	7.1	18.73	4.09	2.22
Denticnema striata	embedder	11.87	6.48	4.97	6.91	18.36	3.92	2.19
Denticnema striata	embedder	13.44	6.93	5.25	6.87	19.05	4.33	2.37
Denticnema striata	embedder	13.64	7.02	5.24	7.18	19.44	3.99	2.39
Denticnema striata	embedder	13.41	6.82	5.06	6.77	18.65	4.25	2.32
Denticnema striata	embedder	13.45	7.11	5.48	6.39	18.98	4.18	2.34
Denticnema striata	embedder	13.06	7.38	5.01	7.18	19.57	4.46	2.3
Denticnema striata	embedder	12	6.89	4.4	5.99	17.28	3.92	2.23
Denticnema striata	embedder	11.48	5.57	4.4	6.16	16.13	3.57	1.98
Denticnema striata	embedder	12.56	5.78	4.75	6.11	16.64	3.48	2.2
Denticnema striata	embedder	12.33	6.58	4.63	7.14	18.35	3.4	2.12
Denticnema striata	embedder	11.91	7.06	4.68	6.49	18.23	4.16	2.24
Denticnema striata	embedder	12.52	7.98	5.52	7.3	20.8	4.48	2.56
Denticnema striata	embedder	11.06	6.39	4.89	6.13	17.41	3.92	1.96
Denticnema striata	embedder	12.47	7.29	5.06	6.74	19.09	4.62	2.33
Denticnema striata	embedder	11.51	6.14	4.69	6.22	17.05	3.77	2.11
Denticnema striata	embedder	11.68	6.54	4.84	7.44	18.82	4.11	1.98
Denticnema striata	embedder	13.11	6.79	5.16	6.67	18.62	4.25	2.28
Denticnema striata	embedder	13.35	7.13	4.98	6.29	18.4	4.21	2.3
Gymnoloma femorata	embedder	7.99	4.15	3.26	4.65	12.06	1.55	0.76
Gymnoloma femorata	embedder	9.04	4.32	3.08	4.85	12.25	1.66	0.83
Gymnoloma femorata	embedder	7.72	3.83	3.32	3.99	11.14	1.29	0.84
Gymnoloma femorata	embedder	8.55	4.6	3.24	4.95	12.79	1.63	0.83
Gymnoloma femorata	embedder	8.95	4.24	3.61	4.82	12.67	1.55	0.78
Gymnoloma femorata	embedder	8.38	4.07	3.56	4.49	12.12	1.46	0.79
Gymnoloma femorata	embedder	8.44	4.23	3.45	4.79	12.47	1.39	0.75
Gymnoloma femorata	embedder	7.82	4.05	3.3	4.73	12.08	1.37	0.84
Gymnoloma femorata	embedder	8.97	4.05	3.57	4.96	12.58	1.65	0.98
Gymnoloma femorata	embedder	8.47	4.28	3.54	4.96	12.78	1.5	0.76
Gymnoloma femorata	embedder	8.06	4.18	3.08	4.87	12.13	1.49	0.86
Gymnoloma femorata	embedder	8.55	4.04	3.3	5.13	12.47	1.34	0.79
Gymnoloma femorata	embedder	8.48	4.22	3.28	4.47	11.97	1.44	0.79
Gymnoloma femorata	embedder	8.76	4.09	3.56	4.67	12.32	1.33	0.8
Gymnoloma femorata	embedder	9.11	4.37	3.24	4.88	12.49	1.59	0.77
Gymnoloma femorata	embedder	8.47	4.24	3.67	4.27	12.18	1.44	0.78
Gymnoloma femorata	embedder	7.39	3.59	2.91	4.4	10.9	1.25	0.77
Gymnoloma femorata	embedder	8.2	4.55	3.5	4.75	12.8	1.54	0.81
Gymnoloma femorata	embedder	7.96	4.17	3.6	4.91	12.68	1.26	0.86
Gymnoloma femorata	embedder	7.32	4.09	3.04	4.3	11.43	1.3	0.73
Gymnoloma femorata	embedder	7.96	3.86	3.38	4.86	12.1	1.43	0.84
Gymnoloma femorata	embedder	6.56	3.47	3.12	4.41	11	1.06	0.58
Gymnoloma femorata	embedder	8.13	4.07	3.43	4.8	12.3	1.56	0.84
Gymnoloma femorata	embedder	8.62	3.8	3.23	4.62	11.65	1.55	0.89
Gymnoloma femorata	embedder	7.22	3.89	2.84	4.28	11.01	1.24	0.81
Gymnoloma femorata	embedder	7.77	4.01	3.05	3.93	10.99	1.21	0.86
Gymnoloma femorata	embedder	8.2	3.6	3.51	4.58	11.69	1.43	0.81
Gymnoloma femorata	embedder	8.33	4.01	3.48	4.62	12.11	1.59	0.92
Gymnoloma femorata	embedder	8.16	4.25	3.47	4.6	12.32	1.55	0.83
Gymnoloma femorata	embedder	7.59	3.72	3.29	4.44	11.45	1.23	0.86
Gymnoloma femorata	embedder	7.95	3.99	3.5	4.84	12.33	1.39	0.77
Gymnoloma femorata	embedder	7.19	3.4	3.35	4.26	11.01	1.21	0.67
Gymnoloma femorata	embedder	7.74	3.99	3.55	4.45	11.99	1.45	0.65
Gymnoloma femorata	embedder	7.24	3.75	3.36	4.44	11.55	1.42	0.73
Gymnoloma femorata	embedder	7.52	3.95	3.66	4.51	12.12	1.41	0.69
Gymnoloma femorata	embedder	8.65	4.07	3.97	3.98	12.02	1.75	0.91
Gymnoloma femorata	embedder	7.91	3.71	3.79	4.11	11.61	1.62	0.83
Gymnoloma femorata	embedder	8.11	4.01	3.5	3.93	11.44	1.7	0.86
Gymnoloma femorata	embedder	7.44	3.35	3.42	4.35	11.12	0.98	0.67
Gymnoloma femorata	embedder	8.02	4.09	3.68	3.75	11.52	1.67	0.86
Gymnoloma femorata	embedder	7.82	3.45	3.35	4.83	11.63	1.43	0.73
Gymnoloma femorata	embedder	8.08	3.71	3.87	3.64	11.22	1.58	0.82
Gymnoloma femorata	embedder	8.31	3.98	4.01	3.83	11.82	1.56	0.92
Gymnoloma femorata	embedder	8.16	3.93	3.88	4.16	11.97	1.79	0.83
Gymnoloma femorata	embedder	7.42	3.71	3.39	4.99	12.09	1.39	0.74
Gymnoloma femorata	embedder	8.34	4.28	4.06	4.82	13.16	1.63	0.71
Gymnoloma femorata	embedder	7.79	3.78	3.5	4.3	11.58	1.24	0.61
Gymnoloma femorata	embedder	8.03	3.92	3.35	4.36	11.63	1.2	0.7
Gymnoloma femorata	embedder	8.23	3.59	3.82	4.62	12.03	1.71	0.79
Gymnoloma femorata	embedder	7.02	3.38	3.2	4.46	11.04	1.67	0.65
Gymnoloma femorata	embedder	7.77	3.7	3.84	4.17	11.71	1.43	0.73
Gymnoloma femorata	embedder	7.89	4.15	3.49	5.27	12.91	1.77	0.78
Gymnoloma femorata	embedder	6.76	3.33	2.78	4.28	10.39	1.45	0.72
Gymnoloma femorata	embedder	7.34	3.14	3.52	3.71	10.37	1.47	0.74
Gymnoloma femorata	embedder	7.02	3.45	3.33	3.73	10.51	1.11	0.72
Gymnoloma femorata	embedder	7.32	3.94	3.4	3.68	11.02	1.77	0.73
Gymnoloma femorata	embedder	8.1	3.87	3.57	4.06	11.5	1.64	0.73
Gymnoloma femorata	embedder	7.24	3.66	3.79	3.55	11	1.42	0.72
Gymnoloma femorata	embedder	7.98	4.17	3.89	4.43	12.49	1.73	0.84
Gymnoloma femorata	embedder	8.29	4.22	3.73	4.86	12.81	1.79	0.79
Heterochelus alienatus	embedder	7.93	5.03	4.26	4.2	13.49	2.2	0.98
Heterochelus alienatus	embedder	7.48	4.49	3.87	4.11	12.47	1.87	0.9
Heterochelus alienatus	embedder	7.55	4.66	3.73	3.78	12.17	1.93	1.05
Heterochelus alienatus	embedder	7.82	4.83	3.96	4.01	12.8	2.03	0.85
Heterochelus alienatus	embedder	8.03	4.94	4.42	4.44	13.8	2.32	1.09
Heterochelus alienatus	embedder	7.74	5.01	4.17	4.2	13.38	2.3	1.04
Heterochelus alienatus	embedder	7.4	4.2	3.53	3.57	11.3	1.86	1.1
Heterochelus alienatus	embedder	7.93	4.43	4.12	4.02	12.57	2.29	1.02
Heterochelus alienatus	embedder	7.77	4.89	4.07	4.15	13.11	2.12	1.09
Heterochelus alienatus	embedder	8.09	4.74	4.1	3.99	12.83	2.09	1.14
Heterochelus alienatus	embedder	8.08	4.64	3.71	3.68	12.03	2.13	1.18
Heterochelus alienatus	embedder	7.74	4.12	3.71	3.71	11.54	1.89	0.81
Heterochelus alienatus	embedder	8.48	5.43	4.38	4.31	14.12	2.43	1.13
Heterochelus alienatus	embedder	7.65	4.21	3.86	3.88	11.95	1.73	1.07
Heterochelus alienatus	embedder	8.08	4.98	4.01	3.81	12.8	2.19	1.02
Heterochelus alienatus	embedder	7.68	4.28	3.99	3.89	12.16	1.83	1.07
Heterochelus alienatus	embedder	7.68	4.96	3.81	3.94	12.71	1.92	0.96
Heterochelus alienatus	embedder	7.24	4.56	3.8	3.66	12.02	1.92	0.89
Heterochelus alienatus	embedder	7.4	4.53	3.81	3.99	12.33	1.95	0.97
Heterochelus alienatus	embedder	7.71	4.71	3.66	4.21	12.58	2.03	1.09
Heterochelus alienatus	embedder	7.54	4.33	3.39	3.92	11.64	1.72	1.02
Heterochelus alienatus	embedder	7.48	4.54	3.8	4.03	12.37	1.97	1.07
Heterochelus alienatus	embedder	7.72	4.82	3.86	3.82	12.5	1.92	1.12
Heterochelus alienatus	embedder	8.4	4.62	4.16	3.96	12.74	2.22	1.11
Heterochelus alienatus	embedder	7.83	4.81	3.92	4.3	13.03	1.91	0.97
Heterochelus alienatus	embedder	7.9	4.59	3.85	3.87	12.31	2.07	1.11
Heterochelus alienatus	embedder	8.33	4.42	3.98	3.93	12.33	1.94	0.99
Heterochelus alienatus	embedder	8.04	4.41	4.14	4.28	12.83	1.92	0.93
Heterochelus alienatus	embedder	7.5	4.57	3.61	3.96	12.14	1.86	0.97
Heterochelus alienatus	embedder	7.98	4.41	3.6	4	12.01	1.79	1
Heterochelus sp.n.17	embedder	7.79	3.92	2.85	4.95	11.72	2.02	2.18
Heterochelus sp.n.17	embedder	9.27	4.88	3.91	5.38	14.17	2.54	2.72
Heterochelus sp.n.17	embedder	8.86	4.69	3	5.3	12.99	2.42	2.73
Heterochelus sp.n.17	embedder	9.68	4.83	3.55	6.07	14.45	2.9	2.86
Heterochelus sp.n.17	embedder	10.43	5.34	3.22	7.14	15.7	3.02	3.19
Heterochelus sp.n.17	embedder	9.39	4.85	2.8	6.31	13.96	2.58	2.78
Heterochelus sp.n.17	embedder	9.8	5.11	3.42	6.16	14.69	3.18	3.07
Heterochelus sp.n.17	embedder	8.56	4.43	2.88	5.93	13.24	2.31	2.6
Heterochelus sp.n.17	embedder	8.1	4.36	3.24	5.47	13.07	2.26	2.52
Heterochelus sp.n.17	embedder	8.42	4.13	2.85	5.92	12.9	2.25	2.45
Heterochelus sp.n.17	embedder	8.91	4.47	3.34	4.88	12.69	2.65	2.61
Heterochelus sp.n.17	embedder	8.85	4.73	3.49	5.69	13.91	2.59	2.83
Heterochelus sp.n.17	embedder	8.93	4.38	3.11	5.15	12.64	2.35	2.57
Heterochelus sp.n.17	embedder	8.69	4.35	3.02	5.47	12.84	2.4	2.67
Heterochelus sp.n.17	embedder	9.22	4.57	3.36	6.01	13.94	2.45	2.6
Heterochelus sp.n.17	embedder	9.95	5.33	3.59	6.39	15.31	3.28	2.98
Heterochelus sp.n.17	embedder	9.43	4.84	3.53	5.73	14.1	3	2.89
Heterochelus sp.n.17	embedder	9.44	5.29	3.25	5.59	14.13	2.91	2.92
Heterochelus sp.n.17	embedder	9.22	4.3	2.96	5.75	13.01	3.13	2.79
Heterochelus sp.n.17	embedder	9.26	4.64	3.41	5.71	13.76	2.62	2.71
Heterochelus sp.n.17	embedder	9.81	5.5	3.54	5.93	14.97	2.83	3.15
Heterochelus sp.n.17	embedder	7.33	3.97	2.64	5.62	12.23	2.1	2.35
Heterochelus sp.n.17	embedder	8.06	3.56	2.75	5.44	11.75	2.08	1.97
Heterochelus sp.n.17	embedder	9.4	5.16	3.16	6.75	15.07	3.49	3.16
Heterochelus sp.n.17	embedder	9.56	5.2	3.81	6.55	15.56	3.08	2.82
Heterochelus sp.n.17	embedder	8.97	4.75	3.15	5.83	13.73	2.73	2.7
Heterochelus sp.n.17	embedder	9.58	5.38	3.33	5.95	14.66	3.2	3.07
Heterochelus sp.n.17	embedder	9.68	5.34	3.39	6.35	15.08	2.91	3
Heterochelus sp.n.17	embedder	10.26	5.39	3.77	5.9	15.06	3.42	3.14
Heterochelus sp.n.17	embedder	9.58	5	3.43	5.82	14.25	2.8	2.87
Heterochelus kochi	embedder	6.14	3.75	2.9	3.57	10.22	1.53	0.64
Heterochelus kochi	embedder	5.66	3.61	2.86	3.65	10.12	1.4	0.5
Heterochelus kochi	embedder	5.72	3.78	2.7	3.43	9.91	1.23	0.52
Heterochelus kochi	embedder	5.62	3.42	2.88	3.36	9.66	1.33	0.48
Heterochelus kochi	embedder	5.18	3.44	2.74	3.22	9.4	1.26	0.57
Heterochelus kochi	embedder	6	3.8	3.07	3.36	10.23	1.39	0.59
Heterochelus kochi	embedder	5.72	2.84	2.12	2.53	7.49	1.08	0.52
Heterochelus kochi	embedder	5.62	2.84	1.98	2.61	7.43	0.81	0.45
Heterochelus kochi	embedder	5.82	3.82	2.98	3.27	10.07	1.52	0.48
Heterochelus kochi	embedder	5.42	2.64	2.21	3.19	8.04	1	0.53
Heterochelus kochi	embedder	5.08	2.97	2.51	3.27	8.75	0.95	0.54
Heterochelus kochi	embedder	4.42	2.37	2.04	2.65	7.06	1.14	0.5
Heterochelus kochi	embedder	5.74	3.03	2.5	2.8	8.33	1.35	0.55
Heterochelus kochi	embedder	5.38	2.75	2.14	2.9	7.79	1.02	0.49
Heterochelus kochi	embedder	5.62	3.18	2.56	3.18	8.92	1.16	0.54
Heterochelus kochi	embedder	4.54	2.02	1.88	2.11	6.01	0.89	0.47
Heterochelus kochi	embedder	4.59	2.48	1.93	2.61	7.02	0.87	0.48
Heterochelus kochi	embedder	4.61	2.51	1.96	2.92	7.39	0.89	0.5
Heterochelus kochi	embedder	5.61	2.96	2.88	3.43	9.27	1.49	0.57
Heterochelus kochi	embedder	5.83	3.6	2.79	3.03	9.42	1.33	0.54
Heterochelus kochi	embedder	5.64	3.52	2.95	3.52	9.99	1.28	0.54
Heterochelus kochi	embedder	5.37	3.16	2.43	2.98	8.57	1.26	0.59
Heterochelus kochi	embedder	5.5	3.28	2.3	3.17	8.75	1.33	0.56
Heterochelus kochi	embedder	5.51	2.74	2.17	2.87	7.78	1.13	0.49
Heterochelus kochi	embedder	5.64	3.47	2.44	3.26	9.17	1.3	0.5
Heterochelus kochi	embedder	4.98	2.44	2.3	2.58	7.32	1.01	0.52
Heterochelus kochi	embedder	5.46	3.14	2.39	3.06	8.59	1.19	0.48
Heterochelus kochi	embedder	5.11	3.23	2.6	3.07	8.9	1.27	0.53
Heterochelus kochi	embedder	5.96	2.94	2.35	2.86	8.15	1.01	0.62
Heterochelus kochi	embedder	5.02	2.72	2.12	2.54	7.38	1.18	0.57
Heterochelus rufimanus	embedder	4.77	2.21	1.28	2.76	6.25	0.98	0.59
Heterochelus rufimanus	embedder	4.81	2.46	1.34	2.55	6.35	0.91	0.5
Heterochelus rufimanus	embedder	5.86	3.27	1.62	2.62	7.31	1.35	0.72
Heterochelus rufimanus	embedder	5.89	3.44	2.1	2.97	8.51	1.53	0.72
Heterochelus rufimanus	embedder	4.76	2.68	1.67	2.46	6.75	1.11	0.66
Heterochelus rufimanus	embedder	5.32	3.1	1.4	2.79	7.29	1.32	0.69
Heterochelus rufimanus	embedder	5.59	3.19	1.85	3.95	8.99	1.36	0.68
Heterochelus rufimanus	embedder	5.15	3.11	1.63	3.78	8.52	1.22	0.63
Heterochelus rufimanus	embedder	5.79	3.45	1.99	3.85	9.29	1.39	0.76
Heterochelus rufimanus	embedder	4.64	2.5	1.27	2.95	6.72	0.84	0.58
Heterochelus rufimanus	embedder	5.45	2.93	1.7	3.65	8.28	1.21	0.62
Heterochelus rufimanus	embedder	5.02	2.95	1.65	3.55	8.15	1.3	0.63
Heterochelus rufimanus	embedder	5.09	3.29	1.67	3.17	8.13	1.31	0.72
Heterochelus rufimanus	embedder	4.9	2.85	1.6	3.42	7.87	1.47	0.61
Heterochelus rufimanus	embedder	4.73	2.11	1.48	2.86	6.45	1.07	0.66
Heterochelus rufimanus	embedder	5.14	3.05	1.46	2.76	7.27	1.32	0.63
Heterochelus rufimanus	embedder	5.2	2.77	1.47	3.48	7.72	1.47	0.61
Heterochelus rufimanus	embedder	4.74	2.33	1.35	3.36	7.04	0.98	0.59
Heterochelus rufimanus	embedder	5.15	2.69	1.63	3.48	7.8	1.17	0.63
Heterochelus rufimanus	embedder	5.07	3.31	1.6	3.36	8.27	1.12	0.66
Heterochelus rufimanus	embedder	5.13	2.82	1.56	3.24	7.62	1.54	0.66
Heterochelus rufimanus	embedder	5.2	2.73	1.76	3.45	7.94	1.48	0.68
Heterochelus rufimanus	embedder	4.79	2.63	1.25	3.23	7.11	1.2	0.67
Heterochelus rufimanus	embedder	5.06	2.86	1.94	3.83	8.63	1.24	0.64
Heterochelus rufimanus	embedder	4.8	2.56	1.87	2.98	7.41	1.27	0.67
Heterochelus rufimanus	embedder	5.04	2.98	1.99	3.61	8.58	1.33	0.72
Heterochelus rufimanus	embedder	5.79	3.34	1.78	3.42	8.54	1.57	0.72
Heterochelus rufimanus	embedder	5.49	3.03	1.59	3.07	7.69	1.33	0.7
Heterochelus rufimanus	embedder	5.08	2.65	1.42	2.96	7.03	1.12	0.7
Heterochelus rufimanus	embedder	5.17	2.64	1.61	3.18	7.43	1.14	0.58
Heterochelus rufimanus	embedder	5.22	2.75	1.69	3.53	7.97	1.21	0.54
Heterochelus rufimanus	embedder	4.21	1.88	1.12	2.66	5.66	0.82	0.58
Heterochelus rufimanus	embedder	5.28	2.71	1.63	3.18	7.52	1.29	0.62
Heterochelus rufimanus	embedder	5.38	3.11	1.65	3.35	8.11	1.42	0.59
Heterochelus rufimanus	embedder	5.09	2.54	1.82	2.93	7.29	1.04	0.6
Heterochelus rufimanus	embedder	4.92	2.45	1.41	3.21	7.07	1.2	0.59
Heterochelus rufimanus	embedder	4.55	2.51	1.56	2.94	7.01	1	0.55
Heterochelus rufimanus	embedder	4.62	2.86	1.51	2.37	6.74	1.1	0.59
Heterochelus rufimanus	embedder	4.41	2.52	1.58	2.96	7.06	1.14	0.51
Heterochelus rufimanus	embedder	4.64	2.37	1.39	2.56	5.32	0.88	0.55
Heterochelus rufimanus	embedder	5.25	3.1	1.39	3.55	8.04	1.23	0.65
Heterochelus rufimanus	embedder	4.78	2.91	1.56	2.86	7.33	1.14	0.58
Heterochelus rufimanus	embedder	5.13	2.78	1.72	2.66	7.16	1.08	0.6
Heterochelus rufimanus	embedder	4.59	2.37	1.47	3.14	6.98	1.03	0.59
Heterochelus rufimanus	embedder	4.6	2.75	1.46	2.87	7.08	1.13	0.62
Heterochelus rufimanus	embedder	5.19	2.95	1.7	3.65	8.3	1.23	0.56
Heterochelus rufimanus	embedder	5.5	3.06	1.63	3.6	8.29	1.52	0.63
Heterochelus rufimanus	embedder	5.19	3.21	1.52	3.3	8.03	1.22	0.65
Heterochelus rufimanus	embedder	5.42	3.51	1.8	2.91	8.22	1.31	0.6
Heterochelus rufimanus	embedder	4.81	2.12	1.35	3.36	6.83	0.84	0.59
Heterochelus rufimanus	embedder	4.55	2.48	1.29	2.62	6.39	0.93	0.57
Heterochelus rufimanus	embedder	4.96	3.17	1.74	2.97	7.88	1.28	0.58
Heterochelus rufimanus	embedder	4.75	3.37	1.59	3.2	8.16	1.27	0.66
Heterochelus rufimanus	embedder	5.53	3.92	2.05	3.92	9.89	1.38	0.67
Heterochelus rufimanus	embedder	5.2	3.14	1.87	3.17	8.18	1.32	0.66
Heterochelus rufimanus	embedder	4.54	2.78	1.44	3.05	7.27	1.21	0.56
Heterochelus rufimanus	embedder	5.13	3.51	1.77	3.18	8.46	1.27	0.65
Heterochelus rufimanus	embedder	4.83	2.85	1.32	3.1	7.27	1.12	0.62
Heterochelus rufimanus	embedder	4.68	2.58	1.67	2.84	7.09	1	0.63
Heterochelus rufimanus	embedder	5.27	3.19	1.8	2.65	7.64	1.23	0.71
Ischnochelus emeritus	embedder	5.81	1.93	1.9	2.45	6.28	0.74	0.57
Ischnochelus emeritus	embedder	5.56	1.78	2.16	2.1	6.04	0.97	0.58
Ischnochelus emeritus	embedder	6.46	1.95	1.97	2.47	6.39	0.94	0.62
Ischnochelus emeritus	embedder	6.3	1.71	1.75	2.41	5.87	0.67	0.51
Ischnochelus emeritus	embedder	5.88	1.95	2.16	2.42	6.53	0.83	0.66
Ischnochelus emeritus	embedder	5.84	2.07	1.95	2.27	6.29	0.88	0.69
Ischnochelus emeritus	embedder	5.78	2.01	1.96	2.67	6.64	0.88	0.55
Ischnochelus emeritus	embedder	5.81	1.93	1.97	3.14	7.04	0.95	0.61
Ischnochelus emeritus	embedder	5.91	1.91	1.92	2.98	6.81	0.82	0.67
Ischnochelus emeritus	embedder	5.79	1.8	1.83	2.32	5.95	0.87	0.62
Ischnochelus emeritus	embedder	5.81	1.83	1.88	2.26	5.97	1.13	0.59
Ischnochelus emeritus	embedder	5.8	1.61	1.9	2.58	6.09	0.77	0.54
Ischnochelus emeritus	embedder	5.3	2.15	1.8	2.36	6.31	0.7	0.66
Ischnochelus emeritus	embedder	5.64	1.66	1.49	2.34	5.49	0.73	0.67
Ischnochelus emeritus	embedder	5.39	1.79	2.02	2.3	6.11	0.83	0.66
Ischnochelus emeritus	embedder	5.87	1.8	1.67	2.1	5.57	0.96	0.62
Ischnochelus emeritus	embedder	5.68	1.46	1.7	2.81	5.97	0.78	0.58
Ischnochelus emeritus	embedder	5.64	1.74	1.76	2.6	6.1	0.71	0.58
Ischnochelus emeritus	embedder	5.25	2.05	1.53	2.65	6.23	0.71	0.5
Ischnochelus emeritus	embedder	6.26	2.45	2.16	2.6	7.21	0.88	0.71
Ischnochelus emeritus	embedder	6.28	1.83	1.76	2.79	6.38	0.69	0.55
Ischnochelus emeritus	embedder	6.17	2.18	2.12	2.63	6.93	0.91	0.64
Ischnochelus emeritus	embedder	6.27	2.14	2.1	2.37	6.61	0.86	0.7
Ischnochelus emeritus	embedder	6.36	1.99	1.9	2.66	6.55	0.88	0.69
Ischnochelus emeritus	embedder	6.12	2.08	1.93	2.38	6.39	0.99	0.72
Ischnochelus emeritus	embedder	6.01	2.05	1.99	2.55	6.59	0.83	0.67
Ischnochelus emeritus	embedder	5.82	1.8	1.74	2.03	5.57	0.81	0.67
Ischnochelus emeritus	embedder	6.04	1.85	1.9	2.92	6.67	0.77	0.77
Ischnochelus emeritus	embedder	5.88	2.13	1.69	2.56	6.38	0.83	0.58
Ischnochelus emeritus	embedder	5.82	2.02	1.83	2.63	6.48	0.83	0.62
Ischnochelus emeritus	embedder	5.7	2.01	1.91	2.35	6.27	0.97	0.61
Ischnochelus emeritus	embedder	5.61	1.72	1.83	2.7	6.25	0.84	0.75
Ischnochelus emeritus	embedder	5.88	1.7	2.07	2.97	6.74	0.86	0.65
Ischnochelus emeritus	embedder	5.88	1.89	2.13	2.51	6.53	0.74	0.6
Ischnochelus emeritus	embedder	5.35	1.94	1.71	2.29	5.94	0.63	0.46
Ischnochelus emeritus	embedder	5.51	1.7	2.26	2.48	6.44	0.79	0.61
Ischnochelus emeritus	embedder	5.54	1.77	1.59	2.45	5.81	0.84	0.56
Ischnochelus emeritus	embedder	5.52	1.78	1.88	2.34	6	0.65	0.55
Ischnochelus emeritus	embedder	5.42	1.6	1.57	2.29	5.46	0.65	0.55
Ischnochelus emeritus	embedder	5.51	1.76	1.62	2.41	5.79	0.73	0.6
Ischnochelus emeritus	embedder	5.4	1.63	1.78	2.5	5.91	0.61	0.49
Ischnochelus emeritus	embedder	5.52	1.65	1.76	2.84	6.25	0.61	0.51
Ischnochelus emeritus	embedder	5.87	1.68	1.96	2.47	6.11	0.67	0.58
Ischnochelus emeritus	embedder	5.55	1.76	2.22	3.06	7.04	0.74	0.72
Ischnochelus emeritus	embedder	5.56	1.77	2.03	2.34	6.14	0.84	0.61
Ischnochelus emeritus	embedder	6.17	1.81	1.82	2.48	6.11	0.75	0.62
Ischnochelus emeritus	embedder	5.63	1.92	2.03	3.05	7	0.73	0.55
Ischnochelus emeritus	embedder	5.81	2.13	1.96	2.42	6.51	0.79	0.57
Ischnochelus emeritus	embedder	5.66	1.75	1.69	2.12	5.56	0.73	0.49
Ischnochelus emeritus	embedder	5.31	1.79	1.8	2.6	6.19	0.75	0.56
Ischnochelus emeritus	embedder	5.76	2.2	1.99	2.63	6.82	0.78	0.54
Ischnochelus emeritus	embedder	5.25	1.77	1.76	2.57	6.1	0.87	0.48
Ischnochelus emeritus	embedder	5.76	1.64	2.07	2.62	6.33	0.73	0.56
Ischnochelus emeritus	embedder	5.55	1.81	1.68	2.44	5.93	0.72	0.66
Ischnochelus emeritus	embedder	5.54	1.6	1.34	2.44	5.38	0.7	0.5
Ischnochelus emeritus	embedder	5.39	1.77	1.69	2.37	5.83	0.76	0.58
Ischnochelus emeritus	embedder	5.59	1.96	1.83	2.23	6.02	0.71	0.44
Ischnochelus emeritus	embedder	6	1.58	1.81	2.78	6.17	0.89	0.54
Ischnochelus emeritus	embedder	6.11	1.55	1.93	2.34	5.82	0.82	0.59
Ischnochelus emeritus	embedder	6.06	1.63	1.75	2.07	5.45	0.81	0.65
Ischnochelus emeritus	embedder	6.34	1.78	2	2.51	6.29	0.88	0.57
Ischnochelus emeritus	embedder	5.96	2.13	1.95	2.53	6.61	0.88	0.63
Ischnochelus emeritus	embedder	5.86	1.75	2.18	2.59	6.52	0.75	0.5
Ischnochelus emeritus	embedder	6	2	1.73	2.65	6.38	0.68	0.57
Ischnochelus emeritus	embedder	5.86	1.84	1.82	2.32	5.98	0.7	0.6
Ischnochelus emeritus	embedder	5.65	1.7	1.87	2.46	6.03	0.84	0.54
Ischnochelus emeritus	embedder	6.12	1.87	1.9	2.73	6.5	0.76	0.55
Ischnochelus emeritus	embedder	6.09	1.96	1.81	2.68	6.45	0.73	0.63
Ischnochelus emeritus	embedder	6.35	2.02	1.95	2.46	6.43	0.84	0.55
Ischnochelus emeritus	embedder	6.17	1.73	1.8	2.4	5.93	0.81	0.6
Ischnochelus emeritus	embedder	6.24	1.97	1.92	2.96	6.85	0.92	0.62
Ischnochelus emeritus	embedder	6	2.04	1.9	2.52	6.46	0.87	0.64
Ischnochelus emeritus	embedder	6.37	1.9	2.12	2.6	6.62	0.87	0.63
Ischnochelus emeritus	embedder	6.01	1.94	1.79	2.81	6.54	0.84	0.56
Ischnochelus emeritus	embedder	6.1	2	1.86	2.47	6.33	0.86	0.56
Ischnochelus emeritus	embedder	6.41	2.17	2	2.55	6.72	0.83	0.64
Ischnochelus emeritus	embedder	6.11	1.63	1.84	2.86	6.33	0.74	0.58
Ischnochelus emeritus	embedder	6.21	2.02	2.04	2.31	6.37	0.89	0.59
Ischnochelus emeritus	embedder	5.84	1.7	1.85	2.38	5.93	0.82	0.66
Ischnochelus emeritus	embedder	6.2	2	2.01	2.23	6.24	0.82	0.66
Mauromecistoplia nieuwoudtvillensis	embedder	9.56	5.41	4.72	7.17	17.3	1.99	1.18
Mauromecistoplia nieuwoudtvillensis	embedder	10.05	5.87	4.37	7.23	17.47	2.08	1.22
Mauromecistoplia nieuwoudtvillensis	embedder	9.68	5.72	4.63	6.64	16.99	1.84	1.21
Mauromecistoplia nieuwoudtvillensis	embedder	9.91	5.78	4.94	6.64	17.36	2.17	1.22
Mauromecistoplia nieuwoudtvillensis	embedder	9.64	5.71	4.26	6.46	16.43	1.89	1.23
Mauromecistoplia nieuwoudtvillensis	embedder	10.22	5.56	4.58	6.83	16.97	1.89	1.08
Mauromecistoplia nieuwoudtvillensis	embedder	10.99	6.16	5.39	7.54	19.09	2.37	1.2
Mauromecistoplia nieuwoudtvillensis	embedder	9.79	5.66	4.86	6.19	16.71	1.83	1.1
Mauromecistoplia nieuwoudtvillensis	embedder	9.55	5.26	4.25	6.3	15.81	1.76	1.11
Mauromecistoplia nieuwoudtvillensis	embedder	8.73	5.01	4.2	6.1	15.31	1.51	1.06
Mauromecistoplia nieuwoudtvillensis	embedder	10.1	6.02	4.73	6.5	17.25	2.07	1.28
Mauromecistoplia nieuwoudtvillensis	embedder	9.59	5.36	4.59	6.57	16.52	1.71	1.14
Mauromecistoplia nieuwoudtvillensis	embedder	10.03	5.92	4.78	7.12	17.82	2.35	1.32
Mauromecistoplia nieuwoudtvillensis	embedder	9.49	5.4	4.59	7.11	17.1	1.68	1.16
Mauromecistoplia nieuwoudtvillensis	embedder	10.33	5.72	5.36	7.13	18.21	2.56	1.4
Mauromecistoplia nieuwoudtvillensis	embedder	8.66	4.94	4.35	6.1	15.39	1.61	1.14
Mauromecistoplia nieuwoudtvillensis	embedder	8.94	4.85	4.08	5.88	14.81	1.42	1.05
Mauromecistoplia nieuwoudtvillensis	embedder	10.13	5.9	4.89	6.97	17.76	2.03	1.18
Mauromecistoplia nieuwoudtvillensis	embedder	9.53	5.72	4.15	6.26	16.13	1.98	1.17
Mauromecistoplia nieuwoudtvillensis	embedder	10.14	5.63	4.5	7.08	17.21	2.14	1.3
Mauromecistoplia nieuwoudtvillensis	embedder	11.09	6.56	4.89	7.46	18.91	2.2	1.32
Mauromecistoplia nieuwoudtvillensis	embedder	8.98	4.56	3.99	6.23	14.78	1.62	1.05
Mauromecistoplia nieuwoudtvillensis	embedder	10.68	6.13	4.91	6.89	17.93	2.06	1.2
Mauromecistoplia nieuwoudtvillensis	embedder	9.92	6.5	5.01	6.95	18.46	2.25	1.05
Mauromecistoplia nieuwoudtvillensis	embedder	8.33	4.31	3.76	5.74	13.81	1.36	0.98
Mauromecistoplia nieuwoudtvillensis	embedder	9.58	5.32	4.42	6.58	16.32	1.79	1.26
Mauromecistoplia nieuwoudtvillensis	embedder	10.07	5.66	4.86	7.3	17.82	1.91	1.2
Mauromecistoplia nieuwoudtvillensis	embedder	10.35	5.86	5.07	6.96	17.89	2.08	1.21
Mauromecistoplia nieuwoudtvillensis	embedder	9.35	5.74	4.48	6.5	16.72	1.78	1.18
Mauromecistoplia nieuwoudtvillensis	embedder	10.06	5.91	4.82	7.12	17.85	1.9	1.25
Pachycnema alternans	embedder	9.17	4.42	4.98	5.74	15.14	1.79	2
Pachycnema alternans	embedder	8.57	4.31	4.37	6.2	14.88	1.7	2.03
Pachycnema alternans	embedder	9.1	4.51	5.31	6.57	16.39	1.71	2.21
Pachycnema alternans	embedder	9.28	4.41	4.59	6.38	15.38	1.64	2.06
Pachycnema alternans	embedder	8.94	4.23	5.09	7.2	16.52	1.94	2.35
Pachycnema alternans	embedder	8.84	4.38	5.19	6.41	15.98	1.95	2.09
Pachycnema alternans	embedder	9.04	4.38	4.56	6.5	15.44	1.72	2.1
Pachycnema alternans	embedder	8.77	3.92	4.87	6.16	14.95	1.55	1.97
Pachycnema alternans	embedder	8.16	4.02	5.04	6.04	15.1	1.82	1.95
Pachycnema alternans	embedder	8.14	4.14	4.16	6.13	14.43	1.56	1.96
Pachycnema alternans	embedder	8.76	3.96	4.98	6.48	15.42	1.79	2.04
Pachycnema alternans	embedder	8.7	4.42	5.1	6.6	16.12	1.89	2.21
Pachycnema alternans	embedder	9.02	4.46	5.36	6.04	15.86	1.94	2.29
Pachycnema alternans	embedder	8.82	4.55	5.1	5.81	15.46	1.89	2.07
Pachycnema alternans	embedder	9.35	4.25	5.14	6.16	15.55	1.88	2.26
Pachycnema alternans	embedder	8.84	4.3	4.96	6.03	15.29	1.59	1.91
Pachycnema alternans	embedder	8.48	4.01	4.47	5.87	14.35	1.56	1.83
Pachycnema alternans	embedder	8.87	4.26	4.87	6.09	15.22	1.8	2.15
Pachycnema alternans	embedder	9	4.35	5.32	6.13	15.8	1.89	2.25
Pachycnema alternans	embedder	9.13	4.69	5.32	6.69	16.7	1.91	2.33
Pachycnema alternans	embedder	9.23	4.45	5.36	6.78	16.59	2.02	2.19
Pachycnema alternans	embedder	8.89	4.3	5.28	6.38	15.96	1.85	2.22
Pachycnema alternans	embedder	9.06	4.8	5.09	6.45	16.34	1.88	2.08
Pachycnema alternans	embedder	9.9	4.44	4.93	6.7	16.07	2.1	2.22
Pachycnema alternans	embedder	9.13	4.76	5.05	6.65	16.46	1.82	2.15
Pachycnema alternans	embedder	9.53	4.81	5.23	6.58	16.62	1.83	2.23
Pachycnema alternans	embedder	8.84	4.19	4.57	6.93	15.69	1.65	2
Pachycnema alternans	embedder	9.1	4.19	4.52	6.09	14.8	2.17	2.1
Pachycnema alternans	embedder	9.14	4.77	4.78	6.48	16.03	1.76	2.07
Pachycnema alternans	embedder	9.2	4.68	4.96	6.68	16.32	2.02	2.29
Pachycnema calcarata	embedder	9.78	4.44	5.5	6.65	16.59	1.92	3.18
Pachycnema calcarata	embedder	8.37	3.25	4.46	6.41	14.12	1.65	2.31
Pachycnema calcarata	embedder	9.61	3.69	4.44	6.79	14.92	2.25	2.8
Pachycnema calcarata	embedder	9.51	4.05	4.16	6.14	14.35	2.46	2.51
Pachycnema calcarata	embedder	8.13	3.59	4.27	6.3	14.16	1.55	2.19
Pachycnema calcarata	embedder	8.09	3.4	3.73	5.87	13	1.6	2.23
Pachycnema calcarata	embedder	8.94	3.93	4.08	6.05	14.06	2.35	2.46
Pachycnema calcarata	embedder	9.26	4.05	4.67	6.39	15.11	2.03	2.65
Pachycnema calcarata	embedder	8.9	4.1	4.42	6.83	15.35	2.01	2.61
Pachycnema calcarata	embedder	8.55	3.78	4.56	6.4	14.74	1.9	2.29
Pachycnema calcarata	embedder	9.06	3.67	4.38	7.9	15.95	2.06	2.66
Pachycnema calcarata	embedder	9.45	4.09	4.74	6.4	15.23	2.43	2.8
Pachycnema calcarata	embedder	9.54	4.5	4.82	7.5	16.82	2.68	2.97
Pachycnema calcarata	embedder	8.97	4	4.46	6.33	14.79	2.12	2.8
Pachycnema calcarata	embedder	9.04	4.08	4.53	6.77	15.38	1.9	2.6
Pachycnema calcarata	embedder	8.36	3.26	3.91	4.9	12.07	1.9	2.41
Pachycnema calcarata	embedder	8.45	3.79	4.03	5.91	13.73	1.69	2.35
Pachycnema calcarata	embedder	7.99	3.7	4.07	5.97	13.74	1.85	2.31
Pachycnema calcarata	embedder	9.36	3.41	4.65	6.63	14.69	2.34	2.66
Pachycnema calcarata	embedder	8.44	3.69	4.89	6.04	14.62	1.94	2.47
Pachycnema calcarata	embedder	10.04	3.83	4.36	6.73	14.92	2.69	2.8
Pachycnema calcarata	embedder	8.25	3.46	3.89	5.6	12.95	1.72	2.13
Pachycnema calcarata	embedder	7.83	3.09	4.01	5.19	12.29	1.54	2.11
Pachycnema calviniana	embedder	7.89	3.82	3.67	4.37	11.86	1.65	1.88
Pachycnema calviniana	embedder	8.12	3.76	3.8	4.9	12.46	1.81	2.11
Pachycnema calviniana	embedder	7.2	3.39	3.77	4.68	11.84	1.62	1.9
Pachycnema calviniana	embedder	8.12	3.97	3.52	5.02	12.51	1.73	1.99
Pachycnema calviniana	embedder	6.93	3.68	3.49	4.85	12.02	1.68	1.78
Pachycnema calviniana	embedder	7.23	3.79	3.36	4.42	11.57	1.48	1.87
Pachycnema calviniana	embedder	7.81	3.82	3.49	4.44	11.75	1.52	1.96
Pachycnema calviniana	embedder	8.77	3.84	3.88	4.62	12.34	1.59	1.9
Pachycnema calviniana	embedder	8.33	4.07	3.97	5.03	13.07	1.82	2.04
Pachycnema calviniana	embedder	8.04	3.86	3.74	4.88	12.48	1.53	1.74
Pachycnema calviniana	embedder	7.34	3.71	3.43	4.3	11.44	1.53	1.64
Pachycnema calviniana	embedder	7.57	3.49	3.13	3.95	10.57	1.32	1.65
Pachycnema calviniana	embedder	8.64	4.35	3.81	4.75	12.91	1.65	2
Pachycnema calviniana	embedder	8.18	4.08	3.63	4.54	12.25	1.55	1.68
Pachycnema calviniana	embedder	7.95	4.06	3.7	4.87	12.63	1.65	2.13
Pachycnema calviniana	embedder	7.98	3.47	3.6	4.62	11.69	1.57	1.79
Pachycnema calviniana	embedder	7.81	3.92	3.66	4.98	12.56	1.55	1.88
Pachycnema calviniana	embedder	8	3.88	3.29	4.32	11.49	1.62	1.78
Pachycnema calviniana	embedder	7.83	4.45	3.86	4.71	13.02	1.8	1.91
Pachycnema calviniana	embedder	7.25	4.01	3.66	4.57	12.24	1.57	1.96
Pachycnema calviniana	embedder	8.11	3.79	3.33	4.3	11.42	1.56	1.87
Pachycnema calviniana	embedder	7.65	3.72	3.68	4.21	11.61	1.36	1.81
Pachycnema calviniana	embedder	8.26	3.84	3.45	4.89	12.18	1.63	1.97
Pachycnema calviniana	embedder	7.89	3.45	3.86	5.09	12.4	1.47	1.96
Pachycnema calviniana	embedder	7.38	3.55	3.36	4.04	10.95	1.29	1.73
Pachycnema calviniana	embedder	7.78	3.56	3.56	4.54	11.66	1.42	1.78
Pachycnema calviniana	embedder	7.71	3.26	3.68	4.86	11.8	1.43	1.87
Pachycnema calviniana	embedder	7.99	4.06	3.48	4.84	12.38	1.49	1.81
Pachycnema calviniana	embedder	7.64	3.73	3.2	4.74	11.67	1.53	1.95
Pachycnema calviniana	embedder	7.54	3.25	3.53	4.7	11.48	1.44	1.94
Pachycnema calviniana	embedder	7.99	3.84	3.6	4.43	11.87	1.61	1.95
Pachycnema calviniana	embedder	7.79	3.19	3.34	4.49	11.02	1.31	1.74
Pachycnema calviniana	embedder	6.75	3.5	3.77	4.31	11.58	1.35	1.86
Pachycnema calviniana	embedder	8.12	3.88	3.45	3.96	11.29	1.56	1.75
Pachycnema calviniana	embedder	7.99	3.12	3.47	4.54	11.13	1.56	1.91
Pachycnema calviniana	embedder	7.98	3.48	3.56	4.56	11.6	1.37	1.82
Pachycnema calviniana	embedder	7.19	3.14	3.69	4.64	11.47	1.25	1.6
Pachycnema calviniana	embedder	8.25	3.66	3.92	4.67	12.25	1.43	1.96
Pachycnema calviniana	embedder	7.67	3.21	3.36	4.53	11.1	1.47	1.78
Pachycnema calviniana	embedder	7.25	3.31	3.48	4.71	11.5	1.31	1.8
Pachycnema calviniana	embedder	8.02	3.91	3.72	4.63	12.26	1.45	1.78
Pachycnema calviniana	embedder	7.85	3.39	3.68	4.3	11.37	1.32	1.87
Pachycnema calviniana	embedder	7.91	3.39	3.31	4.14	10.84	1.46	1.81
Pachycnema calviniana	embedder	7.77	3.91	3.43	4.41	11.75	1.56	1.87
Pachycnema calviniana	embedder	8.46	3.82	4.02	5.27	13.11	1.8	2.08
Pachycnema calviniana	embedder	8.59	3.94	3.95	4.34	12.23	1.69	1.96
Pachycnema calviniana	embedder	7.44	3.45	3.24	3.98	10.67	1.39	1.74
Pachycnema calviniana	embedder	8.47	3.75	3.74	4.37	11.86	1.63	1.87
Pachycnema calviniana	embedder	7.53	4.13	3.58	4.18	11.89	1.66	1.89
Pachycnema calviniana	embedder	7.55	3.56	3.67	4.2	11.43	1.39	1.84
Pachycnema calviniana	embedder	8.4	3.72	3.38	4.68	11.78	1.55	1.99
Pachycnema calviniana	embedder	7.72	3.76	2.97	4.78	11.51	1.53	1.75
Pachycnema calviniana	embedder	7.87	3.38	3.58	4.54	11.5	1.52	1.93
Pachycnema calviniana	embedder	7.65	3.56	3.51	4.77	11.84	1.47	1.83
Pachycnema calviniana	embedder	7.97	3.16	3.48	4.92	11.56	1.52	1.89
Pachycnema calviniana	embedder	7.65	2.86	3.28	4.36	10.5	1.45	1.83
Pachycnema calviniana	embedder	7.51	2.99	3.42	4.34	10.75	1.45	1.79
Pachycnema calviniana	embedder	7.32	3.46	3.02	4.49	10.97	1.36	1.85
Pachycnema calviniana	embedder	8.82	3.8	3.58	4.65	12.03	1.56	1.97
Pachycnema calviniana	embedder	7.65	3.15	3.09	4.88	11.12	1.41	1.66
Pachycnema calviniana	embedder	8.23	3.64	3.78	4.46	11.88	1.49	1.83
Pachycnema calviniana	embedder	9.05	4.1	4.08	5.31	13.49	1.65	2.09
Pachycnema calviniana	embedder	8.76	4	3.54	5.22	12.76	1.59	1.89
Pachycnema calviniana	embedder	7.98	3.46	3.21	4.82	11.49	1.5	1.93
Pachycnema calviniana	embedder	8.4	3.85	3.82	5.11	12.78	1.62	1.92
Pachycnema calviniana	embedder	8.4	3.92	3.59	4.85	12.36	1.58	1.96
Pachycnema calviniana	embedder	7.56	3.57	3.2	3.71	10.48	1.44	1.59
Pachycnema calviniana	embedder	8	3.28	3.5	4.65	11.43	1.72	1.94
Pachycnema calviniana	embedder	8.17	3.92	3.09	4.6	11.61	1.53	1.68
Pachycnema calviniana	embedder	8.13	4.05	3.17	4.59	11.81	1.56	1.88
Pachycnema calviniana	embedder	7.47	2.9	3.14	3.38	9.42	1.27	1.52
Pachycnema calviniana	embedder	7.94	3.52	3.64	4.2	11.36	1.45	1.81
Pachycnema calviniana	embedder	8.71	4.02	3.7	5.05	12.77	1.49	1.88
Pachycnema calviniana	embedder	8.69	3.59	4.19	4.61	12.39	1.66	1.99
Pachycnema calviniana	embedder	7.16	2.97	3.02	4.07	10.06	1.52	1.54
Pachycnema calviniana	embedder	8.26	3.54	3.46	4.65	11.65	1.61	1.92
Pachycnema calviniana	embedder	8.22	3.7	3.61	4.42	11.73	1.67	1.85
Pachycnema calviniana	embedder	8.3	3.57	3.49	4.22	11.28	1.56	1.76
Pachycnema calviniana	embedder	7.2	3.51	3.31	4.3	11.12	1.45	1.61
Pachycnema calviniana	embedder	8.72	3.92	3.42	4.37	11.71	1.5	1.85
Pachycnema calviniana	embedder	8.56	3.42	3.57	4.44	11.43	1.55	1.76
Pachycnema calviniana	embedder	7.69	3.71	3.42	4.18	11.31	1.37	1.65
Pachycnema calviniana	embedder	8.15	3.56	3.4	4.58	11.54	1.53	1.89
Pachycnema calviniana	embedder	8.01	3.19	3.39	4.56	11.14	1.39	1.54
Pachycnema calviniana	embedder	7.76	3.24	3.59	4.57	11.4	1.47	1.83
Pachycnema calviniana	embedder	7.87	3.62	3.6	4.63	11.85	1.47	1.78
Pachycnema calviniana	embedder	8.25	3.19	3.58	4.62	11.39	1.52	1.9
Pachycnema calviniana	embedder	7.33	3.33	3.38	4.44	11.15	1.59	1.78
Pachycnema calviniana	embedder	7.79	3.6	3.51	4.41	11.52	1.43	1.71
Pachycnema calviniana	embedder	7.92	3.43	3.48	4.25	11.16	1.4	1.69
Pachycnema crassipes	embedder	7.9	3.8	4.16	5.43	13.39	1.67	1.95
Pachycnema crassipes	embedder	8.19	3.7	4.32	5.35	13.37	1.55	2.08
Pachycnema crassipes	embedder	7.95	3.67	4.55	5.4	13.62	1.58	1.97
Pachycnema crassipes	embedder	8.57	4.16	4.81	5.53	14.5	1.64	2.06
Pachycnema crassipes	embedder	8.04	3.85	4.48	5.42	13.75	1.63	1.99
Pachycnema crassipes	embedder	8.45	4.03	4.4	4.59	13.02	1.52	1.95
Pachycnema crassipes	embedder	8.33	3.69	4.26	5.06	13.01	1.55	1.92
Pachycnema crassipes	embedder	7.6	3.27	4.3	5.14	12.71	1.34	1.73
Pachycnema crassipes	embedder	7.36	3.77	3.85	4.34	11.96	1.4	1.64
Pachycnema crassipes	embedder	7.9	4.25	4.52	5.1	13.87	1.23	1.87
Pachycnema crassipes	embedder	7.81	4.02	3.78	4.66	12.46	1.48	1.81
Pachycnema crassipes	embedder	8.64	3.77	4.81	5.38	13.96	1.53	2.07
Pachycnema crassipes	embedder	7.84	3.98	4.5	5.41	13.89	1.42	1.92
Pachycnema crassipes	embedder	8.45	3.81	4.37	5.13	13.31	1.42	1.97
Pachycnema crassipes	embedder	7.77	4.21	4.44	5.71	14.36	1.63	1.9
Pachycnema crassipes	embedder	8.42	3.82	4.43	5.11	13.36	1.4	1.91
Pachycnema crassipes	embedder	8.51	4.54	4.89	5.39	14.82	1.62	2.04
Pachycnema crassipes	embedder	8.43	4.05	4.92	5.63	14.6	1.52	2.06
Pachycnema crassipes	embedder	8.79	4.36	5.11	5.97	15.44	1.67	2.17
Pachycnema crassipes	embedder	7.27	3.27	3.81	4.29	11.37	1.36	1.6
Pachycnema crassipes	embedder	7.46	3.57	4.04	4.77	12.38	1.37	1.83
Pachycnema crassipes	embedder	7.57	3.59	4.14	4.8	12.53	1.48	1.7
Pachycnema crassipes	embedder	7.69	3.47	3.79	4.88	12.14	1.44	1.82
Pachycnema crassipes	embedder	8.05	4.13	4.07	5.47	13.67	1.57	1.97
Pachycnema crassipes	embedder	7.76	3.56	3.97	4.38	11.91	1.42	1.78
Pachycnema crassipes	embedder	8.52	4.19	4.69	4.92	13.8	1.55	2.03
Pachycnema crassipes	embedder	7.46	4.19	4.14	4.73	13.06	1.46	1.88
Pachycnema crassipes	embedder	7.48	3.82	3.86	4.69	12.37	1.26	1.58
Pachycnema crassipes	embedder	8.02	3.95	4.61	5.43	13.99	1.55	2.01
Pachycnema crassipes	embedder	8.17	3.95	4.24	4.96	13.15	1.38	1.86
Pachycnema crassipes	embedder	8.86	4.1	4.6	4.83	13.53	1.64	1.97
Pachycnema crassipes	embedder	9.13	3.6	4.44	5.12	13.16	1.59	1.97
Pachycnema crassipes	embedder	8.58	4.14	4.63	5.2	13.97	1.47	1.97
Pachycnema crassipes	embedder	8.6	4.28	4.35	4.78	13.41	1.34	1.99
Pachycnema crassipes	embedder	9.33	4.43	4.71	5.23	14.37	1.53	1.89
Pachycnema crassipes	embedder	8.3	3.74	4.2	4.94	12.88	1.21	1.75
Pachycnema crassipes	embedder	8.76	4.4	4.37	5.25	14.02	1.38	1.87
Pachycnema crassipes	embedder	8.15	3.86	4.08	4.65	12.59	1.4	1.88
Pachycnema crassipes	embedder	8.23	3.55	4.23	5.35	13.13	1.37	1.65
Pachycnema crassipes	embedder	8.6	4.51	4.21	5.19	13.91	1.54	1.84
Pachycnema crassipes	embedder	8.02	4.07	4.11	4.86	13.04	1.38	1.76
Pachycnema crassipes	embedder	8.07	4.14	4.32	5.17	13.63	1.48	1.76
Pachycnema crassipes	embedder	8.37	3.82	4.24	4.9	12.96	1.6	1.88
Pachycnema crassipes	embedder	8.39	3.99	4.23	5.68	13.9	1.47	1.9
Pachycnema crassipes	embedder	9.14	3.72	4.57	5.43	13.72	1.39	1.8
Pachycnema crassipes	embedder	8.37	3.66	4.08	4.92	12.66	1.42	1.74
Pachycnema crassipes	embedder	8.56	3.56	4.43	5.29	13.28	1.45	1.9
Pachycnema crassipes	embedder	8.4	4.02	4.03	5.07	13.12	1.39	1.79
Pachycnema crassipes	embedder	7.98	4.17	4.26	5	13.43	1.47	1.82
Pachycnema crassipes	embedder	9.1	4.47	4.54	5.6	14.61	1.52	1.93
Pachycnema crassipes	embedder	8.3	3.88	4.22	4.76	12.86	1.32	1.69
Pachycnema crassipes	embedder	8.14	3.61	3.7	4.69	12	1.36	1.61
Pachycnema crassipes	embedder	8.02	3.88	4.05	4.71	12.64	1.37	1.78
Pachycnema crassipes	embedder	8.6	4.19	4.62	5.12	13.93	1.45	1.9
Pachycnema crassipes	embedder	8.25	4.22	4.03	4.98	13.23	1.34	1.58
Pachycnema crassipes	embedder	8.57	4.62	4.15	5.07	13.84	1.38	1.73
Pachycnema crassipes	embedder	8.48	4.2	4.78	6.05	15.03	1.58	2.04
Pachycnema crassipes	embedder	8.67	3.67	4.18	5.02	12.87	1.49	1.55
Pachycnema crassipes	embedder	8.19	3.93	4.35	4.75	13.03	1.64	1.78
Pachycnema crassipes	embedder	8.78	4.44	4.47	5.19	14.1	1.4	1.82
Pachycnema crassipes	embedder	8.1	3.99	3.93	4.98	12.9	1.27	1.67
Pachycnema crassipes	embedder	7.95	3.84	4.17	5.21	13.22	1.44	1.67
Pachycnema crassipes	embedder	7.8	3.47	3.92	4.56	11.95	1.55	1.76
Pachycnema crassipes	embedder	7.93	4.32	4.1	5.35	13.77	1.26	1.57
Pachycnema crassipes	embedder	8.31	4.16	3.97	5.11	13.24	1.42	1.75
Pachycnema crassipes	embedder	7.78	3.54	4.33	5.13	13	1.39	1.57
Pachycnema crassipes	embedder	8.39	4.23	4.48	5.15	13.86	1.51	1.82
Pachycnema crassipes	embedder	8.18	3.77	4.06	5.2	13.03	1.4	1.61
Pachycnema crassipes	embedder	8.14	4.27	4.42	5.34	14.03	1.4	1.84
Pachycnema crassipes	embedder	8.31	3.94	4.46	5.42	13.82	1.38	1.72
Pachycnema crassipes	embedder	8.3	4.82	4.12	5.1	14.04	1.55	1.78
Pachycnema crassipes	embedder	8.12	4.37	4.49	5.24	14.1	1.25	1.79
Pachycnema crassipes	embedder	7.88	3.64	4.24	5.2	13.08	1.5	1.75
Pachycnema crassipes	embedder	7.7	3.43	4.09	4.71	12.23	1.38	1.67
Pachycnema crassipes	embedder	7.42	3.6	4.16	5.04	12.8	1.24	1.44
Pachycnema crassipes	embedder	7.66	4.05	3.75	5.37	13.17	1.25	1.5
Pachycnema crassipes	embedder	8.32	3.81	3.86	4.92	12.59	1.52	1.63
Pachycnema crassipes	embedder	7.76	3.57	4.36	4.93	12.86	1.27	1.74
Pachycnema crassipes	embedder	8.24	4.52	4.49	5.18	14.19	1.33	1.7
Pachycnema crassipes	embedder	7.87	4.16	3.8	4.64	12.6	1.63	1.69
Pachycnema crassipes	embedder	7.95	4.26	4.2	4.94	13.4	1.35	1.91
Pachycnema crassipes	embedder	8.93	3.89	4.48	5.31	13.68	1.5	1.99
Pachycnema crassipes	embedder	8.44	4.68	4.2	4.88	13.76	1.52	1.83
Pachycnema crassipes	embedder	8.61	4.59	4.61	5.31	14.51	1.53	1.94
Pachycnema crassipes	embedder	8.91	3.87	4.5	5.44	13.81	1.6	2.04
Pachycnema crassipes	embedder	7.87	3.67	4.31	4.92	12.9	1.51	1.93
Pachycnema crassipes	embedder	8.25	4.25	4.47	4.91	13.63	1.58	1.89
Pachycnema crassipes	embedder	8.05	3.98	4.06	5.14	13.18	1.64	1.73
Pachycnema crassipes	embedder	8.62	3.54	4.27	5.15	12.96	1.45	1.8
Pachycnema crassipes	embedder	8.1	4.11	4.42	5.32	13.85	1.6	1.86
Pachycnema crassipes	embedder	7.71	4.09	4.27	4.94	13.3	1.48	1.84
Pachycnema crassipes	embedder	8.8	3.98	4.35	4.92	13.25	1.8	2.12
Pachycnema crassipes	embedder	8.49	4.14	4.54	5.31	13.99	1.6	1.92
Pachycnema crassipes	embedder	8.66	4.32	4.3	5.32	13.94	1.65	2.17
Pachycnema crassipes	embedder	8.11	4.15	4.31	5.02	13.48	1.43	1.84
Pachycnema crassipes	embedder	8.56	4.15	4.4	5.43	13.98	1.67	1.69
Pachycnema crassipes	embedder	8.02	3.56	4.06	5.13	12.75	1.54	2
Pachycnema crassipes	embedder	8.47	4.42	4.12	5.26	13.8	1.53	2.11
Pachycnema crassipes	embedder	8.75	3.61	3.87	4.95	12.43	1.42	1.83
Pachycnema crassipes	embedder	8.04	3.92	4.18	4.86	12.96	1.47	1.89
Pachycnema crassipes	embedder	9.17	4.58	4.64	5.17	14.39	2.01	2.1
Pachycnema crassipes	embedder	8.47	3.9	4.37	5.02	13.29	1.59	1.89
Pachycnema crassipes	embedder	8.75	4.24	4.65	4.87	13.76	1.67	2.23
Pachycnema crassipes	embedder	8.34	3.98	3.81	5.26	13.05	1.5	1.74
Pachycnema crassipes	embedder	8.32	3.96	4.19	4.9	13.05	1.5	1.97
Pachycnema crassipes	embedder	9.58	4.16	4.54	5.25	13.95	1.9	2.28
Pachycnema crassipes	embedder	8.45	4.05	4.31	6.01	14.37	1.42	1.76
Pachycnema crassipes	embedder	9.11	3.82	4.26	5.2	13.28	1.64	1.93
Pachycnema crassipes	embedder	8.03	3.54	3.8	5.13	12.47	1.37	1.74
Pachycnema crassipes	embedder	8.68	4.06	4.54	5.64	14.24	1.76	2.08
Pachycnema crassipes	embedder	7.9	3.35	3.91	4.84	12.1	1.37	1.62
Pachycnema crassipes	embedder	8.41	3.43	4.46	4.98	12.87	1.28	1.77
Pachycnema crassipes	embedder	7.71	3.46	3.52	4.56	11.54	1.28	1.48
Pachycnema crassipes	embedder	7.77	3.61	3.95	5.04	12.6	1.34	1.74
Pachycnema crassipes	embedder	7.87	3.64	3.94	5.21	12.79	1.3	1.66
Pachycnema crassipes	embedder	8.04	3.55	3.39	4.82	11.76	1.31	1.46
Pachycnema crassipes	embedder	8.14	3.5	3.58	4.76	11.84	1.33	1.65
Pachycnema crassipes	embedder	7.62	3.76	3.91	4.69	12.36	1.26	1.65
Pachycnema crassipes	embedder	7.88	3.64	3.81	4.43	11.88	1.28	1.6
Pachycnema crassipes	embedder	8.23	3.47	3.92	4.87	12.26	1.34	1.61
Pachycnema crassipes	embedder	7.3	3.55	3.56	4.61	11.72	1.08	1.38
Pachycnema crassipes	embedder	8.43	3.78	3.55	4.78	12.11	1.32	1.52
Pachycnema crassipes	embedder	7.51	3.48	3.94	4.81	12.23	1.46	1.73
Pachycnema crassipes	embedder	7.84	3.17	3.94	5.03	12.14	1.18	1.31
Pachycnema crassipes	embedder	8.89	3.7	3.91	5.15	12.76	1.2	1.53
Pachycnema crassipes	embedder	8.7	4.27	4.15	5.09	13.51	1.41	1.74
Pachycnema crassipes	embedder	9.47	4.12	4.2	5.04	13.36	1.47	1.8
Pachycnema crassipes	embedder	8.47	3.67	3.93	4.67	12.27	1.43	1.68
Pachycnema crassipes	embedder	8.94	4.26	4.51	5.56	14.33	1.37	1.85
Pachycnema crassipes	embedder	8.43	4	3.75	5.1	12.85	1.34	1.56
Pachycnema crassipes	embedder	8.63	3.94	3.84	4.68	12.46	1.37	1.87
Pachycnema crassipes	embedder	8.29	3.42	3.59	5.1	12.11	1.5	1.57
Pachycnema crassipes	embedder	8.55	4.1	3.86	4.85	12.81	1.34	1.66
Pachycnema crassipes	embedder	8.27	3.7	3.83	4.62	12.15	1.28	1.42
Pachycnema crassipes	embedder	8.85	3.74	3.91	5.23	12.88	1.37	1.75
Pachycnema crassipes	embedder	8.64	3.97	3.85	5.1	12.92	1.35	1.66
Pachycnema crassipes	embedder	8.67	3.5	3.76	4.92	12.18	1.46	1.64
Pachycnema crassipes	embedder	9.04	3.53	3.96	4.75	12.24	1.37	1.71
Pachycnema crassipes	embedder	8.4	3.86	3.76	4.88	12.5	1.43	1.75
Pachycnema crassipes	embedder	8.61	3.72	3.97	5.14	12.83	1.47	1.76
Pachycnema crassipes	embedder	8.28	4.65	4.25	4.96	13.86	1.5	2.05
Pachycnema crassipes	embedder	8.44	4.43	4.19	4.73	13.35	1.42	1.92
Pachycnema crassipes	embedder	8.7	4.3	4.27	5.28	13.85	1.4	1.96
Pachycnema crassipes	embedder	8.49	4.36	3.99	4.75	13.1	1.34	1.75
Pachycnema crassipes	embedder	8.66	3.83	4.41	5.79	14.03	1.39	1.91
Pachycnema crassipes	embedder	9.94	4.39	4.85	5.16	14.4	1.61	2.3
Pachycnema crassipes	embedder	9.47	4.27	4.53	5.23	14.03	1.43	2.06
Pachycnema crassipes	embedder	10.25	4.25	5.33	5.3	14.88	1.62	2.16
Pachycnema crassipes	embedder	9.6	3.95	4.6	5.1	13.65	1.56	1.99
Pachycnema crassipes	embedder	9.85	4.28	4.53	4.32	13.13	1.49	2.1
Pachycnema crassipes	embedder	10.06	4.46	4.44	4.86	13.76	1.47	1.96
Pachycnema crassipes	embedder	9.19	3.72	4.03	4.97	12.72	1.38	1.72
Pachycnema crassipes	embedder	8.36	3.93	4.3	5.1	13.33	1.27	1.7
Pachycnema crassipes	embedder	8.83	3.93	4.25	4.64	12.82	1.28	1.68
Pachycnema crassipes	embedder	8.41	4.1	4.07	5.08	13.25	1.25	1.67
Pachycnema crassipes	embedder	8.12	4.26	4.04	4.48	12.78	1.3	1.64
Pachycnema crassipes	embedder	9.22	3.72	3.87	4.33	11.92	1.3	1.65
Pachycnema crassipes	embedder	9.08	3.74	4.21	4.69	12.64	1.34	1.75
Pachycnema crassipes	embedder	8.83	4.5	4.03	4.57	13.1	1.41	1.56
Pachycnema crassipes	embedder	8.58	3.8	3.81	4.93	12.54	1.28	1.82
Pachycnema crassipes	embedder	9.76	4.85	4.63	5.18	14.66	1.5	1.85
Pachycnema crassipes	embedder	8.77	3.91	3.87	5	12.78	1.38	1.8
Pachycnema crassipes	embedder	9.27	4.18	4.41	4.82	13.41	1.38	1.75
Pachycnema crassipes	embedder	8.62	3.98	4	4.62	12.6	1.36	1.64
Pachycnema crassipes	embedder	8.47	3.79	3.58	4.8	12.17	1.27	1.68
Pachycnema crassipes	embedder	8.75	4.67	4.6	5.16	14.43	1.47	1.79
Pachycnema crassipes	embedder	8.59	4.37	4.36	4.71	13.44	1.38	1.73
Pachycnema flavolineata	embedder	9.72	4.84	5.27	5.98	16.09	1.87	2.37
Pachycnema flavolineata	embedder	9.23	4.24	4.61	5.29	14.14	1.92	2.29
Pachycnema flavolineata	embedder	8.9	4.49	4.43	6.13	15.05	1.82	2.24
Pachycnema flavolineata	embedder	9.38	4.33	4.44	5.79	14.56	1.98	2.26
Pachycnema flavolineata	embedder	9.32	4.1	4.46	5.74	14.3	2.17	2.35
Pachycnema flavolineata	embedder	9.06	4.62	4.83	6.19	15.64	2.07	2.51
Pachycnema flavolineata	embedder	9.23	3.84	4.46	5.63	13.93	1.87	2.16
Pachycnema flavolineata	embedder	8.89	3.91	4.25	5.76	13.92	2.1	2.28
Pachycnema flavolineata	embedder	8.59	4.07	4.12	5.38	13.57	1.97	2.2
Pachycnema flavolineata	embedder	8.66	3.75	4.15	5.64	13.54	1.78	2.1
Pachycnema flavolineata	embedder	9.14	3.55	4.06	5.62	13.23	1.9	2.25
Pachycnema flavolineata	embedder	10.28	5.49	5.2	6.77	17.46	2.35	2.76
Pachycnema flavolineata	embedder	9.53	4.26	4.77	6.53	15.56	2.12	2.72
Pachycnema flavolineata	embedder	9.47	4.1	4.76	6.85	15.71	2.01	2.58
Pachycnema flavolineata	embedder	9.07	4.29	4.79	6.7	15.78	2.17	2.57
Pachycnema flavolineata	embedder	9.24	4.4	4.48	5.72	14.6	1.85	2.26
Pachycnema flavolineata	embedder	8.79	4.25	4.5	5.47	14.22	1.98	2.26
Pachycnema flavolineata	embedder	8.82	4.55	4.07	5.34	13.96	1.86	2.09
Pachycnema flavolineata	embedder	8.68	4.4	4.05	6.1	14.55	1.74	2.06
Pachycnema flavolineata	embedder	8.85	4.64	4.83	5.97	15.44	1.78	2.46
Pachycnema flavolineata	embedder	9.49	4.92	4.52	6.29	15.73	2.2	2.49
Pachycnema flavolineata	embedder	9.58	3.97	4.69	6.04	14.7	1.91	2.47
Pachycnema flavolineata	embedder	9.3	4.59	4.9	6.28	15.77	2.06	2.31
Pachycnema flavolineata	embedder	10.32	4.64	5.54	6.9	17.08	2.46	2.77
Pachycnema flavolineata	embedder	10.56	4.84	5.21	6.73	16.78	2.39	2.57
Pachycnema flavolineata	embedder	10	4.51	4.95	5.73	15.19	2.07	2.45
Pachycnema flavolineata	embedder	9.28	4.3	5	6.57	15.87	1.96	2.63
Pachycnema flavolineata	embedder	9.72	4.33	4.65	5.82	14.8	2.13	2.55
Pachycnema flavolineata	embedder	9.14	4.07	4.64	5.36	14.07	1.75	2.03
Pachycnema flavolineata	embedder	10.13	3.95	5.02	5.43	14.4	2.05	2.43
Pachycnema murina	embedder	9	3.37	3.15	4.22	10.74	1.39	1.66
Pachycnema murina	embedder	8.2	3.04	3.57	4.48	11.09	1.37	1.57
Pachycnema murina	embedder	8.55	3.64	3.46	4.48	11.58	1.42	1.64
Pachycnema murina	embedder	8.23	3.53	3.26	4.06	10.85	1.33	1.5
Pachycnema murina	embedder	8.01	3.22	3.39	4.06	10.67	1.39	1.39
Pachycnema murina	embedder	8.29	3.71	3.55	4.51	11.77	1.41	1.6
Pachycnema murina	embedder	7.48	3.52	3.38	4.15	11.05	1.25	1.45
Pachycnema murina	embedder	8.05	3.68	3.63	4.99	12.3	1.34	1.64
Pachycnema murina	embedder	8.13	3.4	3.04	4.08	10.52	1.37	1.46
Pachycnema murina	embedder	7.75	3.5	3.3	4.13	10.93	1.47	1.57
Pachycnema murina	embedder	8.8	3.53	3.17	4.11	10.81	1.34	1.41
Pachycnema murina	embedder	8.02	3.73	3.28	4.26	11.27	1.29	1.56
Pachycnema murina	embedder	8.37	3.85	3.24	4.07	11.16	1.36	1.61
Pachycnema murina	embedder	8.48	3.96	3.53	4.64	12.13	1.42	1.45
Pachycnema murina	embedder	8.52	3.5	3.04	4.19	10.73	1.14	1.41
Pachycnema murina	embedder	7.61	3.27	3.42	4.1	10.79	1.33	1.49
Pachycnema murina	embedder	8.33	3.63	3.62	4.53	11.78	1.46	1.68
Pachycnema murina	embedder	8.33	3.27	3.53	4.29	11.09	1.47	1.71
Pachycnema murina	embedder	8.9	3.2	3.45	4.23	10.88	1.37	1.57
Pachycnema murina	embedder	8.5	3.68	3.43	4.7	11.81	1.5	1.63
Pachycnema murina	embedder	8.56	3.36	3.36	4.45	11.17	1.33	1.63
Pachycnema murina	embedder	8.76	3.32	3.51	4.42	11.25	1.4	1.67
Pachycnema murina	embedder	7.95	3.56	3.42	4.14	11.12	1.24	1.71
Pachycnema murina	embedder	8.29	3.26	3.36	4.62	11.24	1.3	1.62
Pachycnema murina	embedder	7.66	3.2	2.87	3.57	9.64	1.2	1.44
Pachycnema murina	embedder	8.72	3.76	3.21	3.98	10.95	1.29	1.4
Pachycnema murina	embedder	8.41	3.49	3.22	4.45	11.16	1.31	1.49
Pachycnema murina	embedder	8.04	3.35	3.38	4.25	10.98	1.41	1.59
Pachycnema murina	embedder	8.27	2.82	3.33	4.13	10.28	1.29	1.38
Pachycnema murina	embedder	8.29	3.44	3.17	4.3	10.91	1.27	1.45
Platychelus sp.n.6	embedder	5.37	1.86	1.83	2.71	6.4	0.65	0.53
Platychelus sp.n.6	embedder	5.75	1.92	1.49	2.77	6.18	0.73	0.47
Platychelus sp.n.6	embedder	4.47	2.1	1.26	2.56	5.92	0.72	0.54
Platychelus sp.n.6	embedder	5.44	1.99	1.48	2.65	6.12	0.79	0.57
Platychelus sp.n.6	embedder	5.6	2.16	1.43	3.24	6.83	0.88	0.56
Platychelus sp.n.6	embedder	5.01	1.48	1.43	2.37	5.28	0.63	0.44
Platychelus sp.n.6	embedder	5.71	1.77	1.51	2.56	5.84	0.83	0.47
Platychelus sp.n.6	embedder	5.43	2.06	1.52	2.62	6.2	0.72	0.6
Platychelus sp.n.6	embedder	5.71	2.05	1.72	2.62	6.39	0.85	0.53
Platychelus sp.n.6	embedder	5.4	1.84	1.39	2.84	6.07	0.77	0.56
Platychelus sp.n.6	embedder	6.03	1.77	1.42	2.74	5.93	0.71	0.46
Platychelus sp.n.6	embedder	6.19	2.19	1.41	3.01	6.61	0.61	0.5
Platychelus sp.n.6	embedder	5.67	1.75	1.42	2.68	5.85	0.71	0.55
Platychelus sp.n.6	embedder	5.13	1.84	1.55	2.57	5.96	0.68	0.49
Platychelus sp.n.6	embedder	5.99	1.83	1.45	2.12	5.4	0.81	0.57
Platychelus sp.n.6	embedder	4.74	1.67	1.32	2.43	5.42	0.63	0.51
Platychelus sp.n.6	embedder	4.67	1.66	1.33	2.12	5.11	0.63	0.43
Platychelus sp.n.6	embedder	4.91	1.99	1.34	2.49	5.82	0.59	0.46
Platychelus sp.n.6	embedder	5.1	1.98	1.39	2.42	5.79	0.78	0.48
Platychelus sp.n.6	embedder	5.3	1.4	1.44	2.58	5.42	0.63	0.53
Platychelus sp.n.6	embedder	5.14	1.78	1.44	2.32	5.54	0.8	0.6
Platychelus sp.n.6	embedder	5.42	1.47	1.55	2.92	5.94	0.77	0.69
Platychelus sp.n.6	embedder	5.14	1.55	1.16	2.15	4.86	0.72	0.5
Platychelus sp.n.6	embedder	5.04	1.45	1.49	2.47	5.41	0.79	0.46
Platychelus sp.n.6	embedder	5.19	1.75	1.42	2.4	5.57	0.64	0.45
Platychelus sp.n.6	embedder	4.36	1.14	1.19	1.74	4.07	0.6	0.46
Platychelus sp.n.6	embedder	4.76	1.62	1.27	2.03	4.92	0.65	0.43
Scelophysa pruinosa	embedder	8.15	3.69	3.36	4.55	11.6	1.03	1.14
Scelophysa pruinosa	embedder	7.89	3.98	3.74	5.24	12.96	1.23	1.14
Scelophysa pruinosa	embedder	7.99	3.94	3.61	4.88	12.43	1.13	1.23
Scelophysa pruinosa	embedder	8.98	3.88	3.58	4.82	12.28	1.21	1.11
Scelophysa pruinosa	embedder	8.75	3.29	3.24	5	11.53	1.19	1.16
Scelophysa pruinosa	embedder	8.42	3.49	3.23	4.57	11.29	1.18	1.23
Scelophysa pruinosa	embedder	7.77	3.6	3.39	4.05	11.04	1.02	1.14
Scelophysa pruinosa	embedder	8.52	4.3	3.5	5.04	12.84	1.32	1.4
Scelophysa pruinosa	embedder	9	3.59	3.59	4.91	12.09	1.18	1.21
Scelophysa pruinosa	embedder	8.22	3.69	3.68	4.88	12.25	1.11	1.16
Scelophysa pruinosa	embedder	8.49	3.92	4.06	5.41	13.39	1.17	1.26
Scelophysa pruinosa	embedder	9.15	4.27	3.97	5.47	13.71	1.33	1.39
Scelophysa pruinosa	embedder	9.03	4.1	3.39	4.97	12.46	1.21	1.21
Scelophysa pruinosa	embedder	9.14	4.02	3.63	5.06	12.71	1.42	1.37
Scelophysa pruinosa	embedder	8.54	3.88	3.47	4.77	12.12	1.22	1.19
Scelophysa pruinosa	embedder	9.11	4.29	3.9	4.86	13.05	1.28	1.21
Scelophysa pruinosa	embedder	9.08	4.09	3.83	4.92	12.84	1.23	1.17
Scelophysa pruinosa	embedder	8.57	3.37	3.1	4.71	11.18	1	1.05
Scelophysa pruinosa	embedder	8.83	4.07	3.69	5.08	12.84	1.13	1.25
Scelophysa pruinosa	embedder	9.42	4.02	3.7	4.93	12.65	1.33	1.31
Scelophysa pruinosa	embedder	9.04	3.82	3.62	4.84	12.28	1.17	1.24
Scelophysa pruinosa	embedder	8.69	3.77	3.55	4.67	11.99	1.21	1.14
Scelophysa pruinosa	embedder	8.97	3.47	3.18	4.88	11.53	1.14	1.02
Scelophysa pruinosa	embedder	8.98	3.96	3.73	5.31	13	1.14	1.12
Scelophysa pruinosa	embedder	8.85	3.83	3.52	5.11	12.46	1.31	1.25
Scelophysa pruinosa	embedder	9.39	4.27	3.64	5.29	13.2	1.17	1.09
Scelophysa pruinosa	embedder	8.57	3.52	3.63	4.21	11.36	1.29	1.23
Scelophysa pruinosa	embedder	8.5	3.85	3.57	4.81	12.23	1.14	1.21
Scelophysa pruinosa	embedder	8.21	3.01	3.05	4.36	10.42	1	1.06
Scelophysa pruinosa	embedder	9.03	3.96	3.73	4.8	12.49	1.15	1.25
Scelophysa strandfonteinensis	embedder	8.89	4.42	4	4.57	12.99	1.31	1.44
Scelophysa strandfonteinensis	embedder	9.7	4.74	4.37	5.3	14.41	1.36	1.51
Scelophysa strandfonteinensis	embedder	8.66	4.23	3.88	4.66	12.77	1.2	1.49
Scelophysa strandfonteinensis	embedder	9.4	4.27	4.18	4.4	12.85	1.33	1.38
Scelophysa strandfonteinensis	embedder	8.74	4.44	4.01	5.02	13.47	1.24	1.27
Scelophysa strandfonteinensis	embedder	9.54	4.21	4.17	4.64	13.02	1.39	1.47
Scelophysa strandfonteinensis	embedder	9.69	4.48	4.43	4.92	13.83	1.27	1.39
Scelophysa strandfonteinensis	embedder	9.34	4.05	4.17	5.06	13.28	1.51	1.6
Scelophysa strandfonteinensis	embedder	9.05	4.25	4.05	4.69	12.99	1.25	1.35
Scelophysa strandfonteinensis	embedder	9.54	4.05	3.96	4.69	12.7	1.35	1.42
Scelophysa strandfonteinensis	embedder	9.27	4.23	4.17	4.78	13.18	1.25	1.39
Scelophysa strandfonteinensis	embedder	9.19	4.39	4.12	5.01	13.52	1.38	1.43
Scelophysa strandfonteinensis	embedder	9.07	4.24	4.11	4.37	12.72	1.32	1.43
Scelophysa strandfonteinensis	embedder	9.55	3.88	3.92	4.62	12.42	1.18	1.36
Scelophysa strandfonteinensis	embedder	9.31	4.5	4.63	4.23	13.36	1.38	1.42
Scelophysa strandfonteinensis	embedder	9.47	4.2	4.43	4.64	13.27	1.43	1.53
Scelophysa strandfonteinensis	embedder	8.73	3.91	4.31	4	12.22	1.31	1.47
Scelophysa trimeni	embedder	9.87	4.16	3.98	5.65	13.79	1.51	1.5
Scelophysa trimeni	embedder	10.27	4.74	3.76	5.48	13.98	1.53	1.51
Scelophysa trimeni	embedder	8.92	4.47	4.21	5.41	14.09	1.34	1.43
Scelophysa trimeni	embedder	9.1	4.17	4.06	5.13	13.36	1.4	1.41
Scelophysa trimeni	embedder	10.44	4.39	4.06	5.31	13.76	1.56	1.63
Scelophysa trimeni	embedder	8.74	3.57	3.95	5.12	12.64	1.35	1.4
Scelophysa trimeni	embedder	9.3	3.84	3.91	5.13	12.88	1.36	1.21
Scelophysa trimeni	embedder	9.35	4.23	3.96	4.67	12.86	1.3	1.44
Scelophysa trimeni	embedder	8.82	3.66	3.8	5.29	12.75	1.43	1.48
Scelophysa trimeni	embedder	8.76	4.14	3.63	4.81	12.58	1.3	1.33
Scelophysa trimeni	embedder	9.65	4.52	3.51	4.74	12.77	1.38	1.51
Scelophysa trimeni	embedder	8.71	4.03	3.57	4.83	12.43	1.24	1.32
Scelophysa trimeni	embedder	9.59	4.39	3.87	5.17	13.43	1.39	1.52
Scelophysa trimeni	embedder	9.56	3.42	3.45	4.41	11.28	1.28	1.19
Scelophysa trimeni	embedder	8.98	3.96	3.54	4.47	11.97	1.21	1.34
Scelophysa trimeni	embedder	9.2	3.6	3.34	5.1	12.04	1.29	1.4
Scelophysa trimeni	embedder	10.55	4.47	3.84	5.73	14.04	1.42	1.59
Scelophysa trimeni	embedder	10.38	4.47	3.86	5.3	13.63	1.55	1.6
Scelophysa trimeni	embedder	10.19	4.84	4.01	5.15	14	1.55	1.5
Scelophysa trimeni	embedder	9.72	4.33	3.99	5.27	13.59	1.54	1.48
Scelophysa trimeni	embedder	9.6	3.93	3.78	5.19	12.9	1.31	1.38
Scelophysa trimeni	embedder	10.36	4.27	3.72	4.7	12.69	1.42	1.53
Scelophysa trimeni	embedder	8.71	3.53	3.94	4.79	12.26	1.26	1.32
Scelophysa trimeni	embedder	9.25	3.72	3.52	4.77	12.01	1.5	1.39
Scelophysa trimeni	embedder	9.79	4.08	3.77	4.33	12.18	1.52	1.42
Scelophysa trimeni	embedder	8.87	4.21	3.23	4.54	11.98	1.16	1.25
Scelophysa trimeni	embedder	8.82	3.87	4.07	5.42	13.36	1.37	1.39
Scelophysa trimeni	embedder	10.81	4.16	3.49	4.77	12.42	1.36	1.41
Scelophysa trimeni	embedder	8.72	4.12	3.55	4.89	12.56	1.32	1.25
Scelophysa trimeni	embedder	9.26	4.14	3.7	5.07	12.91	1.33	1.37
Scelophysa trimeni	embedder	8.43	3.97	3.14	5.24	12.35	1.29	1.27
Scelophysa trimeni	embedder	9.59	4.26	3.1	4.78	12.14	1.43	1.39
Scelophysa trimeni	embedder	8.93	3.68	3.2	4.7	11.58	1.35	1.31
Scelophysa trimeni	embedder	10.02	4.14	3.83	5.55	13.52	1.54	1.48
Scelophysa trimeni	embedder	9.25	3.8	3.45	5.17	12.42	1.47	1.54
Scelophysa trimeni	embedder	9.04	3.65	3.07	4.34	11.06	1.39	1.34
Scelophysa trimeni	embedder	8.76	3.45	3.53	4.76	11.74	1.46	1.37
Scelophysa trimeni	embedder	9.4	3.66	3.23	4.48	11.37	1.45	1.31
Scelophysa trimeni	embedder	9.53	4.13	3.56	4.91	12.6	1.43	1.41
Scelophysa trimeni	embedder	9.2	4.14	3.69	4.79	12.62	1.39	1.35
Scelophysa trimeni	embedder	9.07	3.71	3.64	4.62	11.97	1.38	1.31
Scelophysa trimeni	embedder	8.3	3.33	3.55	4.81	11.69	1.07	1.15
Scelophysa trimeni	embedder	8.66	3.69	3.6	4.98	12.27	1.13	1.21
Scelophysa trimeni	embedder	8.15	3.58	3.24	4.63	11.45	1.14	1.11
Scelophysa trimeni	embedder	8.48	3.71	3.57	4.91	12.19	1.3	1.25
Scelophysa trimeni	embedder	9.11	3.57	3.91	5.44	12.92	1.35	1.28
Scelophysa trimeni	embedder	8.63	3.63	3.58	4.95	12.16	1.34	1.37
Scelophysa trimeni	embedder	8.04	3.86	3.08	4.61	11.55	1.18	1.22
Scelophysa trimeni	embedder	9.38	4.17	3.75	4.97	12.89	1.4	1.28
Scelophysa trimeni	embedder	8.8	3.57	3.42	4.7	11.69	1.28	1.33
Scelophysa trimeni	embedder	7.79	3.41	2.98	4.33	10.72	1.22	1.2
Scelophysa trimeni	embedder	9.19	3.36	3.88	4.59	11.83	1.34	1.31
Scelophysa trimeni	embedder	8.75	3.77	3.43	4.93	12.13	1.11	1.22
Scelophysa trimeni	embedder	8.71	4.2	3.7	5.02	12.92	1.32	1.24
Scelophysa trimeni	embedder	9.02	3.92	3.59	4.99	12.5	1.31	1.49
Scelophysa trimeni	embedder	9.3	3.76	3.55	5.15	12.46	1.29	1.35
Scelophysa trimeni	embedder	8.92	4.37	3.78	5.05	13.2	1.22	1.34
Scelophysa trimeni	embedder	9.2	4.25	3.74	5.43	13.42	1.27	1.23
Scelophysa trimeni	embedder	8.65	4.03	3.83	5.09	12.95	1.37	1.34
Scelophysa trimeni	embedder	8.98	3.76	3.17	4.55	11.48	1.16	1.06
Scelophysa trimeni	embedder	9.57	3.74	3.35	4.84	11.93	1.39	1.34
Scelophysa trimeni	embedder	10.16	4.65	3.9	5.18	13.73	1.48	1.49
Scelophysa trimeni	embedder	10.03	3.81	3.36	5.06	12.23	3.6	1.38
Scelophysa trimeni	embedder	10.01	4.5	3.49	5.23	13.22	1.53	1.48
Scelophysa trimeni	embedder	9.42	3.96	3.38	5.07	12.41	1.49	1.38
Scelophysa trimeni	embedder	10.16	3.63	3.35	5.12	12.1	1.47	1.41
Scelophysa trimeni	embedder	9.63	3.5	3.07	5.31	11.88	1.47	1.3
Scelophysa trimeni	embedder	9.74	3.77	3.47	5.28	12.52	1.74	1.44
Scelophysa trimeni	embedder	9.44	4.25	4.24	5.55	14.04	1.49	1.52
Scelophysa trimeni	embedder	10.86	3.86	3.96	5.62	13.44	1.48	1.4
Scelophysa trimeni	embedder	10.27	4.29	3.33	4.73	12.35	1.5	1.42
Scelophysa trimeni	embedder	10.35	3.94	3.73	5.21	12.88	1.49	1.43
Scelophysa trimeni	embedder	9.05	3.71	3.23	5.2	12.14	1.56	1.38
Scelophysa trimeni	embedder	9.54	4.28	3.7	4.77	12.75	1.47	1.4
Scelophysa trimeni	embedder	9.85	3.62	3.39	5.36	12.37	1.35	1.46
Scelophysa trimeni	embedder	9.26	3.75	3.31	5.05	12.11	1.29	1.28
Scelophysa trimeni	embedder	9.98	4.7	3.36	4.85	12.91	1.58	1.56
Scelophysa trimeni	embedder	10.2	3.89	3.41	4.86	12.16	1.37	1.42
Scelophysa trimeni	embedder	9.86	4.31	3.26	4.88	12.45	1.46	1.41
Scelophysa trimeni	embedder	10.25	4.17	3.42	4.51	12.1	1.63	1.43
Scelophysa trimeni	embedder	9.17	4.25	3.3	4.6	12.15	1.38	1.28
Scelophysa trimeni	embedder	9.55	3.53	3.37	4.38	11.28	1.47	1.45
Scelophysa trimeni	embedder	9.42	3.84	3.73	4.67	12.24	1.42	1.37
Scelophysa trimeni	embedder	9.63	4.09	3.77	5.11	12.97	1.46	1.48
Scelophysa trimeni	embedder	9.12	3.73	3.59	4.77	12.09	1.39	1.3
Scelophysa trimeni	embedder	9.53	3.9	3.74	4.86	12.5	1.65	1.4
Scelophysa trimeni	embedder	9.46	4.29	3.71	4.67	12.67	1.31	1.25
Scelophysa trimeni	embedder	10.07	3.72	3.58	4.93	12.23	1.29	1.36
Scelophysa trimeni	embedder	9.67	4.27	3.55	4.6	12.42	1.35	1.39
Scelophysa trimeni	embedder	9.53	4.19	3.71	4.78	12.68	1.41	1.39
Scelophysa trimeni	embedder	10.08	3.78	3.46	4.9	12.14	1.45	1.42
Scelophysa trimeni	embedder	10.04	3.89	3.75	5.41	13.05	1.59	1.66
Scelophysa trimeni	embedder	10.06	4.15	3.72	5.11	12.98	1.53	1.34
Scelophysa trimeni	embedder	10.74	4.46	3.85	6.49	14.8	1.52	1.65
Scelophysa trimeni	embedder	9.45	3.92	3.28	4.92	12.12	1.62	1.43
Scelophysa trimeni	embedder	9.85	3.64	3.2	5.14	11.98	1.55	1.56
Scelophysa trimeni	embedder	9.71	4.12	3.65	5.19	12.96	1.73	1.5
Scelophysa trimeni	embedder	9.49	3.8	3.46	4.41	11.67	1.49	1.36
Scelophysa trimeni	embedder	10.07	4.41	3.41	5.07	12.89	1.59	1.47
Scelophysa trimeni	embedder	10.01	4.23	3.33	5.1	12.66	1.6	1.26
Scelophysa trimeni	embedder	10.11	3.99	3.19	5.49	12.67	1.43	1.43
Scelophysa trimeni	embedder	9.91	3.59	3.44	5.09	12.12	1.65	1.63
Scelophysa trimeni	embedder	9.71	3.64	3.14	4.81	11.59	1.49	1.42
Scelophysa trimeni	embedder	10.16	4.12	3.34	5	12.46	1.64	1.6
Scelophysa trimeni	embedder	9.98	4.11	3.7	4.9	12.71	1.51	1.47
Scelophysa trimeni	embedder	9.73	4.56	3.67	5.1	13.33	1.59	1.61
Scelophysa trimeni	embedder	9.59	3.63	3.32	4.72	11.67	1.38	1.27
Scelophysa trimeni	embedder	10.12	4.36	3.81	5.2	13.37	1.43	1.48
Scelophysa trimeni	embedder	10.03	4.22	3.61	5.63	13.46	1.58	1.6
Scelophysa trimeni	embedder	10.51	3.81	3.64	5.23	12.68	1.4	1.37
Scelophysa trimeni	embedder	10.11	4.28	3.51	4.96	12.75	1.48	1.64
Scelophysa trimeni	embedder	10.28	4.49	3.8	4.24	12.53	1.53	1.39
Scelophysa trimeni	embedder	9.77	4.35	3.73	5.35	13.43	1.51	1.35
Scelophysa trimeni	embedder	10.64	3.7	3.63	4.9	12.23	1.6	1.4
Scelophysa trimeni	embedder	9.76	4.3	3.65	5.23	13.18	1.58	1.46
Scelophysa trimeni	embedder	9.84	4.31	3.4	5.14	12.85	1.55	1.5
Scelophysa trimeni	embedder	9.87	4.18	3.25	4.93	12.36	1.5	1.46
Scelophysa trimeni	embedder	9.73	4.49	3.48	4.42	12.39	1.69	1.4
Scelophysa trimeni	embedder	9.6	3.75	3.47	4.98	12.2	1.44	1.48
Scelophysa trimeni	embedder	10.2	4.23	3.56	4.95	12.74	1.63	1.6
Scelophysa ulrichi	embedder	10.09	4.73	4.55	4.65	13.93	1.45	1.42
Scelophysa ulrichi	embedder	10.2	4.34	4.02	4.86	13.22	1.34	1.36
Scelophysa ulrichi	embedder	10.38	5.14	4.76	5.49	15.39	1.61	1.56
Scelophysa ulrichi	embedder	10.25	5.09	4.72	5.16	14.97	1.55	1.49
Scelophysa ulrichi	embedder	9.33	5.19	4.59	4.53	14.31	1.52	1.34
Scelophysa ulrichi	embedder	9.54	4.51	4.29	4.41	13.21	1.37	1.3
Scelophysa ulrichi	embedder	10.82	4.61	4.46	5.01	14.08	1.54	1.43
Scelophysa ulrichi	embedder	10.02	4.52	4.44	4.78	13.74	1.52	1.31
Scelophysa ulrichi	embedder	8.87	4.43	4.28	4.38	13.09	1.36	1.16
Scelophysa ulrichi	embedder	9.64	5.03	4.26	4.22	13.51	1.36	1.42
Scelophysa ulrichi	embedder	9.92	4.9	4.43	5.77	15.1	1.55	1.39
Scelophysa ulrichi	embedder	10.68	4.97	4.69	4.66	14.32	1.52	1.35
Scelophysa ulrichi	embedder	9.75	5.04	4.71	4.98	14.73	1.55	1.54
Scelophysa ulrichi	embedder	10.11	4.4	4.5	4.91	13.81	1.43	1.22
Scelophysa ulrichi	embedder	10.44	5.34	4.53	5.52	15.39	1.59	1.49
Scelophysa ulrichi	embedder	11.01	5.15	4.61	5.21	14.97	1.65	1.56
Scelophysa ulrichi	embedder	10.75	4.72	4.76	5.11	14.59	1.56	1.52
Scelophysa ulrichi	embedder	9.79	4.36	4.37	5.62	14.35	1.44	1.45
Scelophysa ulrichi	embedder	10.64	4.81	4.48	5.16	14.45	1.57	1.55
Scelophysa ulrichi	embedder	10.83	4.63	4.4	5.19	14.22	1.53	1.43
Scelophysa ulrichi	embedder	10.07	5.16	4.65	5.42	15.23	1.54	1.44
Scelophysa ulrichi	embedder	10	4.75	4.45	4.98	14.18	1.49	1.42
Scelophysa ulrichi	embedder	10.19	5.03	4.32	4.93	14.28	1.37	1.42
Scelophysa ulrichi	embedder	9.47	4.7	4.33	4.87	13.9	1.38	1.39
Scelophysa ulrichi	embedder	10.07	4.79	4.89	5.49	15.17	1.51	1.48
Scelophysa ulrichi	embedder	9.24	4.56	4.26	5.07	13.89	1.3	1.25
Scelophysa ulrichi	embedder	9.96	4.72	4.53	5.26	14.51	1.51	1.51
Scelophysa ulrichi	embedder	10.04	5.01	4.74	4.75	14.5	1.62	1.56
Scelophysa ulrichi	embedder	10.29	4.72	4.66	5.51	14.89	1.59	1.47
Scelophysa ulrichi	embedder	10.11	4.97	4.71	5.23	14.91	1.35	1.31
Stigmatoplia ornata	embedder	7.17	3.41	3.02	3.8	10.23	1.62	0.81
Stigmatoplia ornata	embedder	7.28	3.45	3.47	4.11	11.03	1.7	0.92
Stigmatoplia ornata	embedder	7.17	3.29	3.22	4.42	10.93	1.67	0.69
Stigmatoplia ornata	embedder	7.45	3.37	3.02	4.76	11.15	1.46	0.8
Stigmatoplia ornata	embedder	6.99	3.38	3.09	3.95	10.42	1.34	0.73
Stigmatoplia ornata	embedder	7.09	3.33	3.08	4.15	10.56	1.49	0.75
Stigmatoplia ornata	embedder	7.32	2.94	3.44	3.69	10.07	1.39	0.65
Stigmatoplia ornata	embedder	7.37	3.37	3.28	4.16	10.81	1.55	0.75
Stigmatoplia ornata	embedder	7.13	3.3	3.12	4.21	10.63	1.43	0.73
Stigmatoplia ornata	embedder	6.53	3	2.88	3.26	9.14	1.11	0.59
Stigmatoplia ornata	embedder	6.73	3.8	2.77	4.11	10.68	1.41	0.63
Stigmatoplia ornata	embedder	7.78	3.5	3.38	3.99	10.87	1.55	0.77
Stigmatoplia ornata	embedder	7.56	3.3	3.56	4.26	11.12	1.5	0.77
Stigmatoplia ornata	embedder	6.55	3.28	2.81	3.87	9.96	1.01	0.56
Stigmatoplia ornata	embedder	6.98	3.15	3.28	4.24	10.67	1.27	0.77
Stigmatoplia ornata	embedder	7.52	3.12	3.1	4.13	10.35	1.55	0.79
Stigmatoplia ornata	embedder	6.8	3.39	3.22	4.15	10.76	1.28	0.65
Stigmatoplia ornata	embedder	6.79	3.42	3.07	3.76	10.25	1.47	0.84
Stigmatoplia ornata	embedder	6.24	3.39	2.97	4.4	10.76	1.24	0.75
Stigmatoplia ornata	embedder	6.78	2.75	3.11	3.62	9.48	1.17	0.72
Stigmatoplia ornata	embedder	7.4	3.13	2.94	4.14	10.21	1.49	0.71
Stigmatoplia ornata	embedder	6.67	3.26	2.82	3.54	9.62	1.16	0.74
Stigmatoplia ornata	embedder	6.63	2.98	2.72	3.64	9.34	1.3	0.66
Stigmatoplia ornata	embedder	6.5	3.31	3.35	3.7	10.36	1.25	0.68
Stigmatoplia ornata	embedder	6.57	2.91	3.13	4.1	10.14	1.27	0.77
Stigmatoplia ornata	embedder	7.88	3.71	3.7	4.33	11.74	1.72	0.94
Stigmatoplia ornata	embedder	6.91	3.18	3.28	4.17	10.63	1.41	0.76
Anisonyx sp.n.3	non-embedder	8.58	4.36	3.46	4.87	12.69	0.99	0.71
Anisonyx sp.n.3	non-embedder	8.97	3.97	3.69	5.18	12.84	1.01	0.7
Anisonyx sp.n.3	non-embedder	9	4.18	3.32	4.87	12.37	0.88	0.72
Anisonyx sp.n.3	non-embedder	9.59	4.42	3.97	5.67	14.06	0.92	0.9
Anisonyx sp.n.3	non-embedder	9.93	4.05	3.57	5.45	13.07	0.98	0.74
Anisonyx sp.n.3	non-embedder	9.44	3.93	3.35	4.6	11.88	0.99	0.66
Anisonyx sp.n.3	non-embedder	9.31	3.66	3.83	5.46	12.95	0.98	0.78
Anisonyx sp.n.3	non-embedder	9.04	3.55	3.74	4.09	11.38	0.93	0.65
Anisonyx sp.n.3	non-embedder	8.31	3.8	3.58	5.44	12.82	0.81	0.71
Anisonyx sp.n.3	non-embedder	9.19	3.56	3.58	4.63	11.77	0.93	0.67
Anisonyx sp.n.3	non-embedder	8.72	3.83	4.14	4.94	12.91	1.09	0.78
Anisonyx sp.n.3	non-embedder	9.09	3.68	3.42	4.62	11.72	0.98	0.74
Anisonyx sp.n.3	non-embedder	9.43	4.09	4.35	5.51	13.95	1.03	0.81
Anisonyx sp.n.3	non-embedder	9.03	4.13	3.97	4.66	12.76	0.9	0.72
Anisonyx sp.n.3	non-embedder	10.92	3.7	3.77	4.46	11.93	1.01	0.68
Anisonyx sp.n.3	non-embedder	8.25	3.39	3.76	4.87	12.02	0.88	0.66
Anisonyx sp.n.3	non-embedder	9.31	3.84	4.15	5.16	13.15	0.99	0.77
Anisonyx sp.n.3	non-embedder	8.42	3.66	3.98	4.75	12.39	1.09	0.66
Anisonyx sp.n.3	non-embedder	8.41	3.48	4.12	5.54	13.14	0.93	0.67
Anisonyx sp.n.3	non-embedder	8.82	4.08	4.03	5.17	13.28	0.96	0.63
Anisonyx sp.n.3	non-embedder	9.36	3.94	3.89	5.56	13.39	1.06	0.94
Anisonyx sp.n.3	non-embedder	9.35	4.02	3.64	5.21	12.87	0.99	0.58
Anisonyx sp.n.3	non-embedder	9.09	3.84	3.62	4.75	12.21	0.85	0.88
Anisonyx sp.n.3	non-embedder	9.09	4.43	3.82	5.42	13.67	0.99	0.8
Anisonyx sp.n.3	non-embedder	8.39	4.1	4.04	4.68	12.82	0.98	0.65
Anisonyx sp.n.3	non-embedder	8.77	4.1	3.71	5.16	12.97	0.94	0.86
Anisonyx sp.n.3	non-embedder	8.98	3.9	3.81	4.92	12.63	0.84	0.74
Anisonyx sp.n.3	non-embedder	9.73	4.03	4.17	5.63	13.83	0.92	0.83
Anisonyx sp.n.3	non-embedder	9.36	3.89	4.17	4.78	12.84	0.93	0.83
Anisonyx sp.n.3	non-embedder	9.16	3.94	3.8	5.1	12.84	0.97	0.69
Chasme decora	non-embedder	7.12	2.39	2.07	2.99	7.45	0.71	0.53
Chasme decora	non-embedder	7.2	2.28	2.19	2.69	7.16	0.68	0.44
Chasme decora	non-embedder	6.46	2.27	1.83	2.86	6.96	0.68	0.46
Chasme decora	non-embedder	6.77	2.55	2.02	3	7.57	0.85	0.56
Chasme decora	non-embedder	6.39	2.48	1.97	2.53	6.98	0.65	0.49
Chasme decora	non-embedder	6.83	2.64	2.01	2.82	7.47	0.75	0.58
Chasme decora	non-embedder	6.94	1.96	1.82	2.86	6.64	0.77	0.54
Chasme decora	non-embedder	6.91	2.51	1.89	2.59	6.99	0.72	0.64
Chasme decora	non-embedder	6.26	2.36	1.67	2.78	6.81	0.68	0.51
Chasme decora	non-embedder	6.75	2.29	1.81	3.12	7.22	0.6	0.63
Chasme decora	non-embedder	7.1	2.52	2.09	3.01	7.62	0.69	0.56
Chasme decora	non-embedder	7.17	2.3	2.03	2.84	7.17	0.66	0.5
Chasme decora	non-embedder	6.69	2.32	1.87	2.87	7.06	0.73	0.52
Chasme decora	non-embedder	6.83	2.02	1.82	3.02	6.86	0.68	0.59
Chasme decora	non-embedder	6.78	2.64	1.97	2.86	7.47	0.69	0.66
Chasme decora	non-embedder	6.66	2.73	2.02	2.86	7.61	0.73	0.58
Chasme decora	non-embedder	7.29	2.35	2.04	2.89	7.28	0.89	0.59
Chasme decora	non-embedder	6.69	2.26	1.93	2.7	6.89	0.76	0.61
Chasme decora	non-embedder	7.53	2.42	2.16	2.97	7.55	0.87	0.63
Khoina haafi	non-embedder	6.35	1.96	2.26	2.85	7.07	0.82	0.55
Khoina haafi	non-embedder	5.73	2.33	2.03	2.61	6.97	0.68	0.48
Khoina haafi	non-embedder	5.94	2.92	2.18	2.85	7.95	0.79	0.63
Khoina haafi	non-embedder	7.07	2.58	2.59	2.97	8.14	0.84	0.71
Khoina haafi	non-embedder	5.69	2.22	2.01	2.6	6.83	0.75	0.47
Khoina haafi	non-embedder	5.86	2.33	2.01	3.06	7.4	0.79	0.56
Khoina haafi	non-embedder	5.74	2.74	2.27	3.09	8.1	0.73	0.61
Khoina haafi	non-embedder	6.4	2.32	2.27	2.73	7.32	0.78	0.57
Khoina haafi	non-embedder	5.78	2.22	1.65	2.73	6.6	0.7	0.59
Khoina haafi	non-embedder	6.31	2.2	2.09	3.02	7.31	0.8	0.61
Khoina haafi	non-embedder	5.98	2.1	1.88	3.34	7.32	0.74	0.57
Khoina haafi	non-embedder	5.83	2.36	1.9	2.85	7.11	0.78	0.56
Khoina haafi	non-embedder	5.9	2.79	2.24	3.35	8.38	0.8	0.57
Khoina haafi	non-embedder	6.19	2.72	1.95	3.12	7.79	0.77	0.57
Khoina haafi	non-embedder	6.59	2.58	1.84	2.98	7.4	0.88	0.61
Khoina haafi	non-embedder	6.06	2.47	2.12	2.93	7.52	0.8	0.63
Khoina haafi	non-embedder	5.8	2.04	1.6	2.32	5.96	0.76	0.53
Khoina haafi	non-embedder	5.69	2.05	1.87	2.81	6.73	0.67	0.51
Khoina haafi	non-embedder	5.71	2.33	2.22	3.22	7.77	0.83	0.58
Khoina haafi	non-embedder	5.95	2.32	1.86	2.84	7.02	0.73	0.53
Khoina haafi	non-embedder	6.23	2.52	1.97	2.98	7.47	0.79	0.57
Khoina haafi	non-embedder	5.83	2.18	1.64	2.75	6.57	0.77	0.57
Khoina haafi	non-embedder	5.48	2.37	1.94	3.02	7.33	0.79	0.56
Khoina haafi	non-embedder	6.05	2.34	1.97	2.5	6.81	0.76	0.59
Khoina haafi	non-embedder	6.03	2.15	2.24	3.27	7.66	0.93	0.51
Khoina haafi	non-embedder	6.03	2.4	2.06	3.33	7.79	0.87	0.5
Khoina haafi	non-embedder	5.61	2.28	1.86	3.02	7.16	0.56	0.48
Khoina haafi	non-embedder	5.95	2.45	2.08	2.89	7.42	0.78	0.59
Khoina haafi	non-embedder	6.12	2.71	2.25	3.55	8.51	0.83	0.69
Khoina haafi	non-embedder	5.72	2.43	2.07	2.86	7.36	0.77	0.54
Knysna sulcicollis	non-embedder	5.71	2.33	2.12	3.26	7.71	1.08	0.76
Knysna sulcicollis	non-embedder	5.05	2.08	1.7	2.75	6.53	0.8	0.66
Knysna sulcicollis	non-embedder	5.62	2.17	2.12	3.12	7.41	0.88	0.74
Knysna sulcicollis	non-embedder	5.24	2.2	1.98	3.48	7.66	1.03	0.67
Knysna sulcicollis	non-embedder	5.69	2.44	2.02	3.18	7.64	1.02	0.73
Knysna sulcicollis	non-embedder	5.73	2.16	1.9	3.42	7.48	0.95	0.64
Knysna sulcicollis	non-embedder	5.19	2.39	2.05	3.4	7.84	0.9	0.7
Knysna sulcicollis	non-embedder	5.85	2.67	2.37	3.15	8.19	1.07	0.76
Knysna sulcicollis	non-embedder	4.99	2.41	1.87	3.27	7.55	0.75	0.64
Knysna sulcicollis	non-embedder	5.03	2.42	2.23	3.03	7.68	0.88	0.67
Knysna sulcicollis	non-embedder	4.99	1.9	1.94	2.96	6.8	0.97	0.58
Knysna sulcicollis	non-embedder	5.47	2.73	2.19	3.23	8.15	1.09	0.71
Knysna sulcicollis	non-embedder	5.43	2.11	1.89	3.09	7.09	0.83	0.57
Knysna sulcicollis	non-embedder	5.13	2.1	2.06	3.45	7.61	0.97	0.65
Knysna sulcicollis	non-embedder	5.46	1.76	2	2.75	6.51	0.77	0.54
Knysna sulcicollis	non-embedder	5.45	2.18	2.29	2.74	7.21	0.96	0.76
Knysna sulcicollis	non-embedder	5.71	2.49	2.1	3.12	7.71	1.1	0.79
Knysna sulcicollis	non-embedder	5.02	2.25	1.9	2.61	6.76	0.8	0.63
Knysna sulcicollis	non-embedder	5.13	2.07	2.12	3.01	7.2	0.89	0.56
Knysna sulcicollis	non-embedder	5.06	2.37	1.94	3.09	7.4	0.86	0.63
Knysna sulcicollis	non-embedder	5.31	2.22	1.81	2.88	6.91	0.91	0.63
Knysna sulcicollis	non-embedder	5.23	1.92	1.98	2.37	6.27	0.74	0.76
Knysna sulcicollis	non-embedder	5.04	1.89	1.88	3.03	6.8	0.84	0.66
Knysna sulcicollis	non-embedder	5.31	2.17	2.05	3.09	7.31	0.85	0.76
Knysna sulcicollis	non-embedder	5.79	2.73	2.21	3.68	8.62	1.04	0.76
Knysna sulcicollis	non-embedder	5.43	2.44	2.04	3.12	7.6	0.98	0.66
Knysna sulcicollis	non-embedder	5.33	1.79	2.07	3.12	6.98	0.95	0.63
Knysna sulcicollis	non-embedder	5.71	2.07	2	2.79	6.86	0.9	0.63
Knysna sulcicollis	non-embedder	5.05	1.99	1.98	2.89	6.86	0.94	0.72
Knysna sulcicollis	non-embedder	5.41	2.43	2.05	3.15	7.63	0.9	0.64
Lepithrix kulzeri	non-embedder	7.99	3	2.68	4.13	9.81	1.1	0.71
Lepithrix kulzeri	non-embedder	6.86	2.46	2.54	3.48	8.48	1.03	0.77
Lepithrix kulzeri	non-embedder	8.19	2.64	2.27	3.55	8.46	0.94	0.74
Lepithrix kulzeri	non-embedder	8.22	2.8	2.59	4.1	9.49	1.02	0.72
Lepithrix kulzeri	non-embedder	7.81	3.08	2.59	3.39	9.06	1.05	0.7
Lepithrix kulzeri	non-embedder	7.36	2.86	2.12	3.44	8.42	0.99	0.76
Lepithrix kulzeri	non-embedder	7.6	2.69	2.48	3.96	9.13	1.02	0.72
Lepithrix kulzeri	non-embedder	7.59	2.67	2.33	3.74	8.74	1.05	0.77
Lepithrix kulzeri	non-embedder	7.65	2.84	2.37	4.03	9.24	0.85	0.68
Lepithrix kulzeri	non-embedder	8.04	3.26	2.33	3.94	9.53	1.14	0.74
Lepithrix kulzeri	non-embedder	7.98	2.57	2.32	3.68	8.57	1.1	0.77
Lepithrix kulzeri	non-embedder	8.45	3.27	2.47	3.91	9.65	0.96	0.82
Lepithrix kulzeri	non-embedder	7.6	2.83	2.5	3.48	8.81	1.01	0.69
Lepithrix kulzeri	non-embedder	7.84	2.91	2.31	3.54	8.76	1.05	0.74
Lepithrix kulzeri	non-embedder	7.55	3.17	2.38	3.63	9.18	1.01	0.76
Lepithrix kulzeri	non-embedder	7.48	2.59	2.28	3.57	8.44	1.01	0.75
Lepithrix kulzeri	non-embedder	7.93	3.24	2.56	3.69	9.49	0.88	0.77
Lepithrix kulzeri	non-embedder	7.77	2.75	2.6	3.69	9.04	1.13	0.78
Lepithrix kulzeri	non-embedder	7.77	3	2.7	3.3	9	0.89	0.62
Lepithrix kulzeri	non-embedder	7.84	3.06	2.44	3.73	9.23	1.21	1.04
Lepithrix kulzeri	non-embedder	7.77	2.76	2.43	4.09	9.28	1.02	0.82
Lepithrix kulzeri	non-embedder	7.57	3.23	2.38	3.59	9.2	0.96	0.71
Lepithrix kulzeri	non-embedder	7.62	2.28	2.47	3.77	8.52	0.96	0.69
Lepithrix kulzeri	non-embedder	7.96	3	2.24	3.66	8.9	1.01	0.74
Lepithrix kulzeri	non-embedder	8.12	2.92	2.24	3.8	8.96	1.06	0.83
Lepithrix kulzeri	non-embedder	7.25	2.83	2.25	3.83	8.91	1	0.77
Lepithrix kulzeri	non-embedder	7.97	2.88	2.31	3.69	8.88	1.02	0.67
Lepithrix kulzeri	non-embedder	8.09	2.92	2.15	3.78	8.85	1.02	0.71
Lepithrix kulzeri	non-embedder	7.94	2.89	2.61	3.48	8.98	1.09	0.8
Lepithrix kulzeri	non-embedder	7.28	2.5	2.53	3.93	8.96	0.92	0.66
Lepithrix longitarsis	non-embedder	8.84	2.83	2.68	4.92	10.43	1.27	0.78
Lepithrix longitarsis	non-embedder	8.9	2.96	2.62	4.81	10.39	1.16	0.73
Lepithrix longitarsis	non-embedder	8.68	4	2.72	4.3	11.02	1.28	0.82
Lepithrix longitarsis	non-embedder	7.98	3.39	3.08	5.01	11.48	0.98	0.68
Lepithrix longitarsis	non-embedder	7.93	3.16	2.34	4.17	9.67	0.94	0.74
Lepithrix longitarsis	non-embedder	7.82	3.13	2.62	4.57	10.32	0.82	0.6
Lepithrix longitarsis	non-embedder	7.7	2.83	2.41	4.47	9.71	1.07	0.74
Lepithrix longitarsis	non-embedder	8.34	3.77	2.95	4.94	11.66	1.05	0.65
Lepithrix longitarsis	non-embedder	8.32	3.17	2.73	5.31	11.21	1.23	0.7
Lepithrix longitarsis	non-embedder	8.22	3.24	2.66	3.97	9.87	1.04	0.72
Lepithrix longitarsis	non-embedder	7.88	3.21	2.67	4.47	10.35	1.01	0.72
Lepithrix longitarsis	non-embedder	8.31	3.36	2.77	4.44	10.57	1.01	0.6
Lepithrix longitarsis	non-embedder	8.27	2.88	2.45	4.75	10.08	1.2	0.7
Lepithrix longitarsis	non-embedder	7.55	3.18	2.79	4.52	10.49	0.96	0.53
Lepithrix longitarsis	non-embedder	8.28	3.26	2.59	4.36	10.21	1.03	0.74
Lepithrix longitarsis	non-embedder	8.14	3.15	2.57	4.86	10.58	1.13	0.93
Lepithrix longitarsis	non-embedder	7.51	2.82	2.73	4.78	10.33	0.9	0.58
Lepithrix longitarsis	non-embedder	8.37	2.97	2.79	4.84	10.6	1.11	0.74
Lepithrix longitarsis	non-embedder	8.13	2.73	2.25	4.23	9.21	1.08	0.78
Lepithrix longitarsis	non-embedder	8.13	3.36	2.44	4.96	10.76	1.07	0.77
Lepithrix longitarsis	non-embedder	8.35	2.69	2.71	4.83	10.23	1.21	0.85
Lepithrix longitarsis	non-embedder	8.7	2.99	2.71	4.76	10.46	1.17	0.72
Lepithrix longitarsis	non-embedder	8.03	2.9	2.3	4.44	9.64	1.09	0.72
Lepithrix longitarsis	non-embedder	8.16	3.29	2.55	4.66	10.5	1.15	0.78
Lepithrix longitarsis	non-embedder	8.19	3.21	2.56	4.73	10.5	1.09	0.63
Lepithrix longitarsis	non-embedder	8.93	3.64	2.61	3.99	10.24	1.01	0.76
Lepithrix longitarsis	non-embedder	8.04	3.04	2.45	3.57	9.06	1	0.9
Lepithrix longitarsis	non-embedder	7.27	2.68	2.35	4.39	9.42	1	0.59
Lepithrix sp.n.1	non-embedder	7.13	2.71	2.69	4.14	9.54	0.86	0.62
Lepithrix sp.n.1	non-embedder	7.19	2.78	2.64	4.41	9.83	0.79	0.55
Lepithrix sp.n.1	non-embedder	7.26	3.42	2.69	4.5	10.61	0.81	0.49
Lepithrix sp.n.1	non-embedder	7.53	2.85	2.76	5.01	10.62	0.8	0.54
Lepithrix sp.n.1	non-embedder	6.35	2.74	2.33	4.32	9.39	0.77	0.53
Lepithrix sp.n.1	non-embedder	6.81	2.67	2.73	4.28	9.68	0.89	0.51
Lepithrix sp.n.1	non-embedder	7.98	3.3	2.61	4.58	10.49	0.81	0.61
Lepithrix sp.n.1	non-embedder	7.24	3.05	2.83	4.72	10.6	0.92	0.65
Lepithrix sp.n.1	non-embedder	6.75	3.15	2.62	4.07	9.84	0.86	0.55
Lepithrix sp.n.1	non-embedder	6.51	2.93	2.66	4.25	9.84	0.78	0.5
Lepithrix sp.n.1	non-embedder	7	3.55	2.64	4.44	10.63	0.8	0.46
Lepithrix sp.n.1	non-embedder	6.15	3.08	2.88	3.97	9.93	0.8	0.48
Lepithrix sp.n.1	non-embedder	6.39	2.75	2.49	4.27	9.51	0.79	0.63
Lepithrix sp.n.1	non-embedder	6.85	3.18	2.57	4.55	10.3	0.73	0.53
Lepithrix sp.n.1	non-embedder	6.84	3.11	2.88	4.29	10.28	0.81	0.53
Lepithrix sp.n.1	non-embedder	6.98	3.34	3.12	4.52	10.98	0.89	0.51
Lepithrix sp.n.1	non-embedder	6.64	3.3	2.37	4.53	10.2	0.78	0.55
Lepithrix sp.n.1	non-embedder	7.15	2.9	2.59	4.15	9.64	0.85	0.54
Lepithrix sp.n.1	non-embedder	7.55	3.26	2.97	4.73	10.96	0.9	0.52
Lepithrix sp.n.1	non-embedder	6.54	2.78	2.48	4.11	9.37	0.79	0.47
Lepithrix sp.n.1	non-embedder	7.1	3.6	2.96	4.96	11.52	0.77	0.52
Lepithrix sp.n.1	non-embedder	6.82	2.91	2.8	4.32	10.03	0.83	0.58
Lepithrix sp.n.1	non-embedder	6.61	2.57	2.57	4.55	9.69	0.78	0.53
Lepithrix sp.n.1	non-embedder	6.99	3	2.85	4.16	10.01	0.73	0.4
Lepithrix sp.n.1	non-embedder	7.04	3.28	2.86	4.71	10.85	0.82	0.49
Lepithrix sp.n.1	non-embedder	6.61	2.48	2.89	4.74	10.11	0.64	0.55
Lepithrix sp.n.1	non-embedder	6.81	2.78	2.28	4.01	9.07	0.74	0.51
Lepithrix sp.n.1	non-embedder	7.41	3.2	2.88	4.32	10.4	0.93	0.55
Lepithrix sp.n.1	non-embedder	6.79	2.94	2.26	4.59	9.79	0.82	0.52
Lepithrix sp.n.1	non-embedder	7.21	3.21	2.87	3.96	10.04	0.81	0.54
Lepithrix sp.n.1	non-embedder	8.18	3.07	3	4.51	10.58	1.06	0.66
Lepisia braunsi	non-embedder	7.06	2.85	1.94	3.72	8.51	0.99	0.72
Lepisia braunsi	non-embedder	7.18	2.87	2.34	3.98	9.19	0.97	0.67
Lepisia braunsi	non-embedder	7.2	3.29	2.29	3.8	9.38	1.03	0.77
Lepisia braunsi	non-embedder	6.89	3.3	2.12	3.53	8.95	0.99	0.77
Lepisia braunsi	non-embedder	7.31	3.37	2.32	3.57	9.26	1.09	0.75
Lepisia braunsi	non-embedder	7.34	3.07	2.17	3.92	9.16	1.02	0.7
Lepisia braunsi	non-embedder	7.81	3.14	2.55	4.02	9.71	0.99	0.74
Lepisia braunsi	non-embedder	7.56	2.96	2.53	3.58	9.07	1.05	0.73
Lepisia braunsi	non-embedder	6.45	2.75	2.1	3.63	8.48	0.9	0.68
Lepisia braunsi	non-embedder	7.16	3.05	2.16	3.94	9.15	0.99	0.73
Lepisia braunsi	non-embedder	7.63	3.11	2.33	3.98	9.42	0.97	0.67
Lepisia braunsi	non-embedder	7.17	2.76	2.26	3.84	8.86	1.04	0.69
Lepisia braunsi	non-embedder	7.18	2.93	2.25	3.82	9	0.96	0.68
Lepisia braunsi	non-embedder	6.95	2.78	2.44	3.91	9.13	0.96	0.64
Lepisia braunsi	non-embedder	7.57	3.15	2.42	4.01	9.58	1.1	0.77
Lepisia braunsi	non-embedder	7.49	3.33	2.55	4.2	10.08	1.13	0.79
Lepisia braunsi	non-embedder	6.8	2.89	2.3	3.83	9.02	1.03	0.75
Lepisia braunsi	non-embedder	6.93	2.71	1.88	3.83	8.42	0.92	0.66
Lepisia braunsi	non-embedder	7.07	2.73	2.09	3.66	8.48	0.97	0.69
Lepisia braunsi	non-embedder	7.38	3.14	2.29	3.87	9.3	1.09	0.76
Lepisia braunsi	non-embedder	7.41	3.02	2.24	3.95	9.21	0.95	0.72
Lepisia braunsi	non-embedder	7.48	2.52	2.02	3.63	8.17	0.99	0.67
Lepisia braunsi	non-embedder	6.49	2.33	2.12	3.57	8.02	0.99	0.63
Lepisia braunsi	non-embedder	7.54	2.78	2.29	3.95	9.02	0.83	0.74
Lepisia braunsi	non-embedder	7.68	3.25	2.12	3.84	9.21	0.99	0.73
Lepisia braunsi	non-embedder	7.68	3.33	2.4	4.02	9.75	1	0.78
Lepisia sp. n.1	non-embedder	7.74	3.14	2.9	4.45	10.49	0.94	0.64
Lepisia sp. n.1	non-embedder	8.66	3.68	3.35	5.17	12.2	1.13	0.79
Lepisia sp. n.1	non-embedder	8.51	3.87	3.4	4.77	12.04	1.17	0.74
Lepisia sp. n.1	non-embedder	8.41	3.91	3.26	4.92	12.09	1.1	0.74
Lepisia sp. n.1	non-embedder	8.51	3.41	3.36	5.12	11.89	1.08	0.8
Lepisia sp. n.1	non-embedder	8.37	3.64	3.59	5.16	12.39	1.12	0.79
Lepisia sp. n.1	non-embedder	8.35	3.51	3.34	4.73	11.58	0.9	0.82
Lepisia sp. n.1	non-embedder	8.68	3.97	3.07	4.93	11.97	1.01	0.79
Lepisia sp. n.1	non-embedder	9.1	3.76	3.35	4.86	11.97	1.16	0.81
Lepisia sp. n.1	non-embedder	8.13	3.7	3.64	5.44	12.78	1.07	0.81
Lepisia sp. n.1	non-embedder	8.15	3.86	3.35	5.17	12.38	1.14	0.79
Lepisia sp. n.1	non-embedder	8.5	3.46	3.2	4.81	11.47	1.02	0.78
Lepisia sp. n.1	non-embedder	8.7	3.19	3.17	5.09	11.45	1.05	0.77
Lepisia sp. n.1	non-embedder	8.64	3.87	3.45	5.37	12.69	1.08	0.75
Lepisia sp. n.1	non-embedder	8.18	3.46	2.91	4.67	11.04	0.98	0.76
Lepisia sp. n.1	non-embedder	8.74	3.94	3.65	4.38	11.97	1.06	0.83
Lepisia sp. n.1	non-embedder	8.72	3.58	3.18	4.61	11.37	1.11	0.82
Lepisia sp. n.1	non-embedder	8.04	3.7	3.32	4.4	11.42	1.13	0.71
Lepisia sp. n.1	non-embedder	8.17	3.91	3.61	4.73	12.25	1.15	0.71
Lepisia sp. n.1	non-embedder	8.17	3.36	3.35	4.75	11.46	0.95	0.69
Lepisia sp. n.1	non-embedder	8.54	3.98	3.36	4.77	12.11	0.91	0.81
Lepisia sp. n.1	non-embedder	7.83	3.61	3.5	4.53	11.64	0.9	0.79
Lepisia sp. n.1	non-embedder	8.33	3.39	3.17	4.91	11.47	1.09	0.91
Lepisia sp. n.1	non-embedder	8.12	3.52	3.28	4.9	11.7	0.91	0.94
Lepisia sp. n.1	non-embedder	8.45	3.6	3.01	4.07	10.68	1	0.73
Lepisia sp. n.1	non-embedder	7.55	3.39	2.61	3.86	9.86	0.84	0.66
Lepisia sp. n.1	non-embedder	7.69	3.33	3.2	4.5	11.03	0.85	0.8
Lepisia sp. n.1	non-embedder	8.67	3.65	2.84	4.81	11.3	0.89	0.64
Lepisia sp. n.1	non-embedder	8.43	3.34	3.08	4.71	11.13	1.02	0.78
Lepisia sp. n.1	non-embedder	7.58	3.51	3.45	4.34	11.3	1.06	0.65
Lepisia sp. n.3	non-embedder	8.84	3.64	3.84	4.18	11.66	1.03	0.64
Lepisia sp. n.3	non-embedder	8.96	3.64	3.75	4.32	11.71	1.13	0.72
Lepisia sp. n.3	non-embedder	8.25	3.51	3.6	4.55	11.66	1.14	0.66
Lepisia sp. n.3	non-embedder	8.91	3.77	3.63	4.64	12.04	1.25	0.64
Lepisia sp. n.3	non-embedder	8.8	3.99	3.76	4.79	12.54	1.1	0.72
Lepisia sp. n.3	non-embedder	9.58	3.64	3.87	4.76	12.27	1.11	0.66
Lepisia sp. n.3	non-embedder	9.06	4.07	3.59	4.76	12.42	1.15	0.63
Lepisia sp. n.3	non-embedder	8.56	3.46	3.73	4.96	12.15	1.11	0.71
Lepisia sp. n.3	non-embedder	9.33	3.58	3.24	4.05	10.87	1.17	0.72
Lepisia sp. n.3	non-embedder	9.46	3.58	3.37	4.55	11.5	1.33	0.8
Lepisia sp. n.3	non-embedder	9.55	4.1	3.51	4.61	12.22	1.28	0.71
Lepisia sp. n.3	non-embedder	8.54	3.18	3.64	4.43	11.25	1.02	0.67
Lepisia sp. n.3	non-embedder	8.55	3.67	3.39	4.25	11.31	1.11	0.66
Lepisia sp. n.3	non-embedder	9.67	3.7	3.74	5.06	12.5	1.21	0.68
Lepisia sp. n.3	non-embedder	8.6	3.86	3.5	4.73	12.09	1.19	0.67
Lepisia sp. n.3	non-embedder	8.63	3.68	3.26	4.52	11.46	1.11	0.67
Lepisia sp. n.3	non-embedder	8.66	3.69	3.21	4.71	11.61	1.16	0.64
Lepisia sp. n.3	non-embedder	8.71	3.69	3.12	4.43	11.24	1.12	0.71
Lepisia sp. n.3	non-embedder	8.74	3.58	3.85	4.94	12.37	1.18	0.68
Lepisia sp. n.3	non-embedder	9.26	3.78	3.85	4.4	12.03	1.23	0.67
Lepisia sp. n.3	non-embedder	8.55	3.7	3.08	4.5	11.28	1.11	0.73
Lepisia sp. n.3	non-embedder	8.95	3.82	3.71	4.48	12.01	1.17	0.72
Lepisia sp. n.3	non-embedder	8.79	3.71	3.66	4.38	11.75	1.21	0.69
Lepisia sp. n.3	non-embedder	9.36	4.14	3.28	4.72	12.14	1.12	0.67
Lepisia sp. n.3	non-embedder	8.9	3.78	3.27	4.65	11.7	1.2	0.76
Lepisia sp. n.3	non-embedder	9.27	3.92	3.46	4.83	12.21	1.05	0.7
Lepisia sp. n.3	non-embedder	9.3	3.99	3.29	4.97	12.25	1.37	0.76
Lepisia sp. n.3	non-embedder	9.28	4.34	3.5	4.88	12.72	1.18	0.69
Lepisia sp. n.3	non-embedder	9.59	3.87	3.74	4.93	12.54	1.2	0.83
Lepisia sp. n.3	non-embedder	8.87	3.69	3.67	4.69	12.05	1.17	0.7
Peritrichia pistrinaria	non-embedder	7.94	3.67	3.11	3.71	10.49	1	0.87
Peritrichia pistrinaria	non-embedder	7.69	3.07	2.81	3.79	9.67	0.94	0.75
Peritrichia pistrinaria	non-embedder	7.47	2.99	2.76	3.57	9.32	0.89	0.76
Peritrichia pistrinaria	non-embedder	8.3	3.78	3.04	3.88	10.7	0.9	0.81
Peritrichia pistrinaria	non-embedder	8.01	3.33	2.48	3.96	9.77	0.89	0.81
Peritrichia pistrinaria	non-embedder	8.19	3.24	3.04	3.63	9.91	0.92	0.91
Peritrichia pistrinaria	non-embedder	8.15	3.4	3.08	3.51	9.99	0.74	0.85
Peritrichia pistrinaria	non-embedder	7.45	3.02	2.77	3.57	9.36	0.82	0.74
Peritrichia pistrinaria	non-embedder	9.2	3.15	2.57	3.76	9.48	1.14	0.81
Peritrichia pistrinaria	non-embedder	7.65	3.53	2.92	3.33	9.78	0.93	0.77
Peritrichia pistrinaria	non-embedder	7.78	3.41	3.03	3.4	9.84	0.97	0.83
Peritrichia pistrinaria	non-embedder	7.88	3.62	3.15	3.82	10.59	0.97	0.88
Peritrichia pistrinaria	non-embedder	7.8	3.16	2.73	3.5	9.39	0.94	0.79
Peritrichia pistrinaria	non-embedder	7.64	3.35	2.58	3.15	9.08	0.9	0.8
Peritrichia pistrinaria	non-embedder	7.77	4	2.91	4.02	10.93	0.81	0.68
Peritrichia pistrinaria	non-embedder	7.72	3.18	3.1	3.39	9.67	0.92	0.8
Peritrichia pistrinaria	non-embedder	8.05	3.34	3.09	3.77	10.2	1.05	0.86
Peritrichia pistrinaria	non-embedder	7.43	3	3.19	3.61	9.8	0.8	0.73
Peritrichia pistrinaria	non-embedder	8.13	3.01	2.77	4.06	9.84	0.98	0.8
Peritrichia pistrinaria	non-embedder	7.4	3.45	3	3.27	9.72	1	0.77
Peritrichia pistrinaria	non-embedder	7.55	3.66	2.99	3.75	10.4	0.94	0.83
Peritrichia pistrinaria	non-embedder	7.72	3.28	3.09	3.53	9.9	1.03	0.85
Peritrichia pistrinaria	non-embedder	7.38	3	2.79	3.59	9.38	1	0.78
Peritrichia pistrinaria	non-embedder	7.4	3.61	3.01	3.59	10.21	0.97	0.81
Peritrichia pistrinaria	non-embedder	7.25	3.08	2.96	3.78	9.82	0.86	0.81
Peritrichia pistrinaria	non-embedder	7.78	3.69	3.19	3.95	10.83	0.85	0.87
Peritrichia pistrinaria	non-embedder	7	2.96	2.67	3.03	8.66	0.9	0.69
Peritrichia pistrinaria	non-embedder	7.67	3.41	2.61	3.89	9.91	0.9	0.83
Peritrichia pistrinaria	non-embedder	7.94	3.44	2.99	3.98	10.41	0.95	0.91
Peritrichia pistrinaria	non-embedder	7.83	3.25	2.78	3.54	9.57	1.03	0.87
Peritrichia pistrinaria	non-embedder	7.74	3.38	3.65	3.83	10.86	1.02	0.78
Peritrichia pistrinaria	non-embedder	7.01	3.35	3.35	3.87	10.57	0.87	0.73
Peritrichia pistrinaria	non-embedder	7.5	3.43	3.54	3.87	10.84	0.97	0.69
Peritrichia pistrinaria	non-embedder	8.09	3.51	3.83	4.15	11.49	0.97	0.76
Peritrichia pistrinaria	non-embedder	7.36	3.33	3.16	3.75	10.24	0.96	0.77
Peritrichia pistrinaria	non-embedder	7.56	3.41	3.53	3.56	10.5	0.85	0.7
Peritrichia pistrinaria	non-embedder	7.22	3.16	3.48	3.73	10.37	0.96	0.76
Peritrichia pistrinaria	non-embedder	7.48	3.72	3.34	3.63	10.69	0.82	0.73
Peritrichia pistrinaria	non-embedder	7.62	3.88	3.77	3.56	11.21	1.06	0.82
Peritrichia pistrinaria	non-embedder	7.48	4.15	3.72	3.86	11.73	0.89	0.76
Peritrichia pistrinaria	non-embedder	7.86	4.31	3.6	3.89	11.8	0.72	0.72
Peritrichia pistrinaria	non-embedder	7.34	3.77	3.7	3.98	11.45	0.86	0.78
Peritrichia pistrinaria	non-embedder	7.5	3.53	3.36	3.44	10.33	0.97	0.76
Peritrichia pistrinaria	non-embedder	8.28	3.34	3.6	3.72	10.66	0.86	0.82
Peritrichia pistrinaria	non-embedder	7.18	3.62	3.62	3.49	10.73	0.91	0.73
Peritrichia pistrinaria	non-embedder	7.7	3.27	3.42	3.66	10.35	0.9	0.81
Peritrichia pistrinaria	non-embedder	7.56	3.64	3.11	3.5	10.25	0.9	0.77
Peritrichia pistrinaria	non-embedder	7.96	3.65	3.7	3.33	10.68	0.92	0.8
Peritrichia pistrinaria	non-embedder	8	3.99	3.57	3.8	11.36	0.84	0.77
Peritrichia pistrinaria	non-embedder	7.88	3.45	3.23	3.86	10.54	0.95	0.77
Peritrichia pistrinaria	non-embedder	7.63	3.33	3.51	4.36	11.2	0.93	0.73
Peritrichia pistrinaria	non-embedder	7.39	3.64	3.5	3.95	11.09	0.91	0.73
Peritrichia pistrinaria	non-embedder	8.14	3.93	3.78	4.02	11.73	0.97	0.81
Peritrichia pistrinaria	non-embedder	7.18	3.88	3.47	3.33	10.68	0.92	0.73
Peritrichia pistrinaria	non-embedder	7.88	3.21	3.51	3.34	10.06	0.91	0.71
Peritrichia pistrinaria	non-embedder	7.47	3.43	3.24	3.5	10.17	0.99	0.73
Peritrichia pistrinaria	non-embedder	7.62	3.73	3.31	3.3	10.34	0.98	0.76
Peritrichia pistrinaria	non-embedder	7.43	3.31	3.76	4.19	11.26	0.98	0.69
Peritrichia pistrinaria	non-embedder	8.08	3.46	3.52	3.84	10.82	0.93	0.71
Peritrichia pistrinaria	non-embedder	7.67	3.45	3.01	3.95	10.41	1.02	0.71
Peritrichia pistrinaria	non-embedder	7.41	3.43	3.44	3.52	10.39	1.04	0.82
Peritrichia pistrinaria	non-embedder	7.52	3.33	3.4	3.96	10.69	0.96	0.73
Peritrichia pistrinaria	non-embedder	7.45	3.47	3.32	3.75	10.54	0.83	0.72
Peritrichia pistrinaria	non-embedder	8.06	3.3	3.26	3.37	9.93	0.89	0.65
Peritrichia pistrinaria	non-embedder	6.97	3.12	3.41	3.69	10.22	0.84	0.69
Peritrichia pistrinaria	non-embedder	7.51	2.97	3.06	3.5	9.53	0.83	0.78
Peritrichia pistrinaria	non-embedder	8.03	4.05	3.42	3.7	11.17	0.97	0.8
Peritrichia pistrinaria	non-embedder	7.49	4.01	3.66	3.34	11.01	0.85	0.66
Peritrichia pistrinaria	non-embedder	8.37	3.29	2.91	3.45	9.65	0.82	0.72
Peritrichia pistrinaria	non-embedder	7.51	3.71	3.38	3.64	10.73	0.92	0.74
Peritrichia pistrinaria	non-embedder	7.28	3.83	3.51	3.56	10.9	0.95	0.75
Peritrichia pistrinaria	non-embedder	7.71	3.39	3.32	3.82	10.53	0.97	0.73
Peritrichia pistrinaria	non-embedder	7.59	3.08	3.63	3.68	10.39	0.96	0.79
Peritrichia pistrinaria	non-embedder	7.25	3.26	2.97	3.09	9.32	0.96	0.75
Peritrichia pistrinaria	non-embedder	7.28	3.78	3.28	2.96	10.02	0.97	0.73
Peritrichia pistrinaria	non-embedder	7.44	3.74	3.35	3.89	10.98	0.91	0.75
Peritrichia pistrinaria	non-embedder	7.1	3.49	3.25	3.88	10.62	0.9	0.71
Peritrichia pistrinaria	non-embedder	7.4	3.49	3.59	3.56	10.64	0.95	0.72
Peritrichia pistrinaria	non-embedder	7.89	3.37	3.58	3.76	10.71	0.86	0.63
Peritrichia pistrinaria	non-embedder	8.38	3.38	3.62	4.02	11.02	0.96	0.74
Peritrichia pistrinaria	non-embedder	7.74	3.35	3.49	4.13	10.97	0.96	0.78
Peritrichia pistrinaria	non-embedder	7.74	3.74	3.26	3.64	10.64	1.08	0.78
Peritrichia pistrinaria	non-embedder	7.55	3.18	3.33	3.99	10.5	0.9	0.76
Peritrichia pistrinaria	non-embedder	8.07	3.78	3.51	3.63	10.92	1.05	0.77
Peritrichia pistrinaria	non-embedder	7.98	3.77	3.23	3.69	10.69	1.01	0.85
Peritrichia pistrinaria	non-embedder	7.85	3.57	3.68	3.89	11.14	0.99	0.89
Peritrichia pistrinaria	non-embedder	8.97	3.59	3.55	4.09	11.23	1.05	0.83
Peritrichia hessei	non-embedder	7.52	2.68	1.96	2.84	7.48	0.76	0.69
Peritrichia hessei	non-embedder	7.08	2.83	2.5	2.7	8.03	0.8	0.65
Peritrichia hessei	non-embedder	7.32	3.04	2.11	2.51	7.66	0.76	0.49
Peritrichia hessei	non-embedder	7.37	2.74	2.05	3.11	7.9	0.74	0.57
Peritrichia hessei	non-embedder	7.4	2.96	2.09	2.47	7.52	0.77	0.58
Peritrichia hessei	non-embedder	7.2	2.63	2.58	2.78	7.99	0.79	0.6
Peritrichia hessei	non-embedder	6.81	2.49	2.36	3.31	8.16	0.71	0.53
Peritrichia hessei	non-embedder	7.53	3.06	2.28	2.78	8.12	0.86	0.67
Peritrichia hessei	non-embedder	7.28	2.89	2.48	2.66	8.03	0.8	0.6
Peritrichia hessei	non-embedder	7.26	2.79	2.21	2.74	7.74	0.8	0.63
Peritrichia hessei	non-embedder	7.15	2.79	1.88	2.65	7.32	0.77	0.61
Peritrichia hessei	non-embedder	7.06	2.78	1.94	2.96	7.68	0.76	0.62
Peritrichia hessei	non-embedder	7.49	2.82	2.19	2.64	7.65	0.77	0.62
Peritrichia hessei	non-embedder	7.37	2.78	2.52	2.62	7.92	0.85	0.68
Peritrichia hessei	non-embedder	7.13	2.63	2.15	2.57	7.35	0.69	0.66
Peritrichia hessei	non-embedder	7.09	2.2	2.24	2.15	6.59	0.7	0.65
Peritrichia hessei	non-embedder	6.73	2.24	2.29	2.63	7.16	0.81	0.56
Peritrichia hessei	non-embedder	6.56	2.14	2.41	2.23	6.78	0.71	0.62
Peritrichia hessei	non-embedder	7.58	3.05	2.16	3.11	8.32	0.65	0.59
Peritrichia hessei	non-embedder	7.18	2.69	2.4	3	8.09	0.77	0.58
Peritrichia hessei	non-embedder	7.32	2.38	2.35	3.06	7.79	0.82	0.54
Peritrichia hessei	non-embedder	6.75	2.65	2.26	3.1	8.01	0.8	0.61
Peritrichia hessei	non-embedder	7.6	2.12	2.38	3.32	7.82	0.86	0.63
Peritrichia hessei	non-embedder	7.07	2.53	2.23	3.21	7.97	0.67	0.61
Peritrichia hessei	non-embedder	7.47	2.81	2.28	3.14	8.23	0.77	0.65
Peritrichia hessei	non-embedder	7.61	2.8	2.18	3.31	8.29	0.79	0.64
Peritrichia hessei	non-embedder	6.72	2.25	2	2.69	6.94	0.71	0.59
Peritrichia hessei	non-embedder	6.9	2.48	2.08	2.8	7.36	0.69	0.58
Peritrichia hessei	non-embedder	7.03	2.84	2.27	2.68	7.79	0.63	0.63
Peritrichia hessei	non-embedder	7.03	2.77	2.24	3.21	8.22	0.7	0.58
Peritrichia ypsilon	non-embedder	7.85	3.27	2.85	3.68	9.8	0.83	0.71
Peritrichia ypsilon	non-embedder	7.14	3.08	2.85	3.95	9.88	0.83	0.67
Peritrichia ypsilon	non-embedder	7.93	3.26	3.29	3.91	10.46	0.83	0.66
Peritrichia ypsilon	non-embedder	7.95	3.03	2.91	3.35	9.29	0.86	0.72
Peritrichia ypsilon	non-embedder	7.24	3.58	2.88	3.68	10.14	0.84	0.7
Peritrichia ypsilon	non-embedder	7.15	3.37	3.3	4.4	11.07	0.79	0.62
Peritrichia ypsilon	non-embedder	7.45	3.08	2.94	3.68	9.7	0.82	0.62
Peritrichia ypsilon	non-embedder	6.93	3.27	3.14	3.45	9.86	0.88	0.55
Peritrichia ypsilon	non-embedder	7.52	3.25	3.17	3.59	10.01	0.83	0.69
Peritrichia ypsilon	non-embedder	6.91	3.15	2.8	3.6	9.55	0.72	0.64
Peritrichia ypsilon	non-embedder	7.36	3.41	3	3.63	10.04	0.82	0.69
Peritrichia ypsilon	non-embedder	7.64	3.5	2.69	3.63	9.82	0.76	0.56
Peritrichia ypsilon	non-embedder	6.91	3.31	2.89	4.29	10.49	0.74	0.66
Peritrichia ypsilon	non-embedder	7.26	3.09	2.85	3.69	9.63	0.67	0.57
Peritrichia ypsilon	non-embedder	7.24	2.98	2.91	3.98	9.87	0.8	0.75
Peritrichia ypsilon	non-embedder	7.45	3.42	2.9	3.79	10.11	0.68	0.71
Peritrichia ypsilon	non-embedder	7.92	3.63	3.34	3.98	10.95	0.85	0.77
Peritrichia ypsilon	non-embedder	7.22	3.04	2.99	4.12	10.15	0.81	0.68
Peritrichia ypsilon	non-embedder	7.04	3.33	3.41	3.6	10.34	0.82	0.58
Peritrichia ypsilon	non-embedder	7.48	3.35	3.26	3.62	10.23	0.85	0.81
Peritrichia ypsilon	non-embedder	7.53	3.46	2.67	3.91	10.04	0.83	0.78
Peritrichia ypsilon	non-embedder	7.11	3.12	2.95	3.66	9.73	0.83	0.64
Peritrichia ypsilon	non-embedder	8.12	3.11	3.05	3.93	10.09	0.89	0.65
Peritrichia ypsilon	non-embedder	8.09	3.25	2.54	3.52	9.31	1.01	0.74
Peritrichia ypsilon	non-embedder	6.88	3.39	2.98	3.48	9.85	0.78	0.7
Peritrichia ypsilon	non-embedder	7.51	3.31	2.95	4.04	10.3	0.99	0.64
Peritrichia ypsilon	non-embedder	6.7	2.85	3	3.5	9.35	0.8	0.72
Peritrichia ypsilon	non-embedder	7.39	3.11	2.88	3.82	9.81	0.88	0.69
Peritrichia ypsilon	non-embedder	7.29	3.33	3.32	4.02	10.67	0.84	0.71
Peritrichia ypsilon	non-embedder	6.94	3.47	3.49	3.99	10.95	0.95	0.68
Anisochelus hilaris	non-embedder	7.64	3.56	3.17	4.61	11.34	0.75	0.67
Anisochelus hilaris	non-embedder	6.9	3.63	2.75	4.1	10.48	0.71	0.58
Anisochelus hilaris	non-embedder	7.35	3.8	3.33	3.91	11.04	0.68	0.64
Anisochelus hilaris	non-embedder	7.82	3.36	3.12	4.23	10.71	0.74	0.76
Anisochelus hilaris	non-embedder	7.69	3.48	3.22	4.51	11.21	0.79	0.76
Anisochelus hilaris	non-embedder	7.34	3.2	2.93	4.25	10.38	0.82	0.66
Anisochelus hilaris	non-embedder	8.11	4.04	3.52	4.6	12.16	0.87	0.76
Anisochelus hilaris	non-embedder	7.73	3.7	3.21	4.08	10.99	0.77	0.62
Anisochelus hilaris	non-embedder	7.11	3.89	3.49	4.25	11.63	0.77	0.77
Anisochelus hilaris	non-embedder	8.03	3.41	3.2	3.38	9.99	0.77	0.77
Anisochelus hilaris	non-embedder	7.09	3.44	3.15	4.03	10.62	0.66	0.55
Anisochelus hilaris	non-embedder	7.89	3.5	3.12	4.44	11.06	0.79	0.7
Anisochelus hilaris	non-embedder	6.7	3.36	3.12	4.13	10.61	0.82	0.72
Anisochelus hilaris	non-embedder	8.12	3.69	3.28	3.97	10.94	0.79	0.75
Anisochelus hilaris	non-embedder	7.82	3.81	3.73	4.71	12.25	0.9	0.82
Anisochelus hilaris	non-embedder	7.21	3.28	3.27	4.12	10.67	0.81	0.78
Anisochelus hilaris	non-embedder	8.2	3.12	2.74	4.29	10.15	0.79	0.72
Anisochelus hilaris	non-embedder	7.21	3.75	3.22	4.22	11.19	0.72	0.68
Anisochelus hilaris	non-embedder	7.59	4.19	3.38	4.63	12.2	0.8	0.72
Anisochelus hilaris	non-embedder	7.72	3.62	3.21	4.43	11.26	0.78	0.64
Anisochelus hilaris	non-embedder	7.18	3.49	2.9	3.91	10.3	0.73	0.7
Anisochelus hilaris	non-embedder	7.92	3.83	3.44	4.39	11.66	0.83	0.71
Anisochelus hilaris	non-embedder	7	2.9	2.94	3.79	9.63	0.8	0.76
Anisochelus hilaris	non-embedder	7.8	3.84	3.25	4	11.09	0.72	0.74
Anisochelus hilaris	non-embedder	6.88	2.74	2.89	3.9	9.53	0.79	0.79
Anisochelus hilaris	non-embedder	6.78	3.27	2.73	3.88	9.88	0.75	0.7
Anisochelus hilaris	non-embedder	7.13	3.31	3.07	4.47	10.85	0.69	0.77
Anisochelus hilaris	non-embedder	7.83	3.18	2.89	3.96	10.03	0.75	0.73
Anisochelus hilaris	non-embedder	7.23	3.16	2.38	3.69	9.23	0.61	0.78
Anisochelus hilaris	non-embedder	6.89	3.39	2.92	3.62	9.93	0.75	0.72
Anisochelus inornatus	non-embedder	6.13	2.57	2.05	3.12	7.74	0.73	0.54
Anisochelus inornatus	non-embedder	6.47	2.07	2.07	3.24	7.38	0.77	0.53
Anisochelus inornatus	non-embedder	6.23	2.61	1.91	3.12	7.64	0.71	0.47
Anisochelus inornatus	non-embedder	5.6	2.15	1.76	3.04	6.95	0.63	0.52
Anisochelus inornatus	non-embedder	6.39	2.32	2.12	3.14	7.58	0.71	0.53
Anisochelus inornatus	non-embedder	6.79	2.85	2.14	3.27	8.26	0.76	0.53
Anisochelus inornatus	non-embedder	5.88	2.26	2.1	3.01	7.37	0.73	0.48
Anisochelus inornatus	non-embedder	6.45	2.73	2.02	3.17	7.92	0.76	0.56
Anisochelus inornatus	non-embedder	6.22	2.48	1.88	3.12	7.48	0.74	0.53
Anisochelus inornatus	non-embedder	6.21	2.69	2	2.96	7.65	0.71	0.52
Anisochelus inornatus	non-embedder	6.1	2.59	2.13	3.41	8.13	0.64	0.61
Anisochelus inornatus	non-embedder	6.27	2.61	2.07	3.42	8.1	0.77	0.49
Anisochelus inornatus	non-embedder	6.14	2.3	1.88	3.02	7.2	0.62	0.51
Anisochelus inornatus	non-embedder	5.93	2.38	2.06	3.09	7.53	0.79	0.51
Anisochelus inornatus	non-embedder	6.58	2.66	2.48	3.23	8.37	0.8	0.53
Anisochelus inornatus	non-embedder	6.16	2.22	1.91	3.52	7.65	0.72	0.63
Anisochelus inornatus	non-embedder	5.27	1.94	1.57	2.67	6.18	0.69	0.52
Anisochelus inornatus	non-embedder	5.58	2.41	1.96	2.91	7.28	0.65	0.43
Anisochelus inornatus	non-embedder	6.52	2.1	1.99	3.25	7.34	0.78	0.5
Anisochelus inornatus	non-embedder	5.61	2.04	2.19	3.17	7.4	0.67	0.46
Anisochelus inornatus	non-embedder	6.3	2.49	2.01	3.25	7.75	0.62	0.5
Anisochelus inornatus	non-embedder	5.93	2.33	2.06	2.89	7.28	0.65	0.59
Anisochelus inornatus	non-embedder	6.63	2.17	1.92	2.74	6.83	0.76	0.52
Anisochelus inornatus	non-embedder	5.68	2.04	1.92	2.99	6.95	0.77	0.59
Anisochelus inornatus	non-embedder	6.25	2.39	2.16	3.03	7.58	0.69	0.48
Anisochelus inornatus	non-embedder	6.1	2.61	1.96	3.26	7.83	0.71	0.55
Anisochelus inornatus	non-embedder	5.86	2.33	1.86	2.84	7.03	0.72	0.45
Anisochelus inornatus	non-embedder	6.2	2.46	1.86	2.91	7.23	0.71	0.49
Anisochelus inornatus	non-embedder	5.56	2.19	1.62	2.95	6.76	0.66	0.55
Anisochelus inornatus	non-embedder	5.64	2.06	1.97	2.73	6.76	0.8	0.54
