# Supplementary material for: Feeding ecology and sexual dimorphism in a speciose flower beetle clade (Hopliini: Scarabaeidae)
Source: PeerJ. 2018 Jun 20;6:e4632. doi: 10.7717/peerj.4632 (PMC6015485; doi:10.7717/peerj.4632)
Supplement: Supplemental Information 4 — Raw data–Coefficients of the fitted major axes regression models with slope and upper and lower confidence intervals (CI). Data from Table S2 were used in the regression models of male body lengths against hind leg traits (lengths and thicknesses). [file peerj-06-4632-s004.xlsx]

## Sheet: Sheet1
Table S3. Raw data - Coefficients of the fitted major axes regression models with slope and upper and lower confidence intervals (CI). Data from Table S2 were used in the regression models of male body lengths against hind leg traits (lengths and thicknesses).
Taxon	Guild	Hind leg trait	r2	pval	Slope	Lower CI	Upper CI
Anisochelus hilaris	non-embedder	femur length	0.137045	0.0440439	1.58343	1.11329	2.25212
Anisochelus hilaris	non-embedder	femur thickness	0.108718	0.0751779	1.34131	0.93788	1.91828
Anisochelus hilaris	non-embedder	leg length	0.18847	0.016529	1.21479	0.862903	1.71017
Anisochelus hilaris	non-embedder	tibia length	0.153043	0.0325404	1.52706	1.07704	2.16511
Anisochelus hilaris	non-embedder	tibia thickness	0.0305865	0.355299	1.55316	1.07017	2.25414
Anisochelus hilaris	non-embedder	tarsi length	0.102717	0.084219	1.32188	0.923225	1.89267
Anisochelus inornatus	non-embedder	femur length	0.315804	0.00123031	1.66108	1.21228	2.27605
Anisochelus inornatus	non-embedder	femur thickness	0.140095	0.0415777	1.25995	0.886385	1.79097
Anisochelus inornatus	non-embedder	leg length	0.460697	3.73947e-05	1.08568	0.820054	1.43734
Anisochelus inornatus	non-embedder	tibia length	0.308491	0.00144182	1.43019	1.04207	1.96286
Anisochelus inornatus	non-embedder	tibia thickness	0.0124727	0.556832	1.41005	0.968351	2.05322
Anisochelus inornatus	non-embedder	tarsi length	0.24966	0.0049338	1.09416	0.787139	1.52094
Anisonyx sp.n.3	non-embedder	femur length	0.0276872	0.379507	1.14993	0.79191	1.6698
Anisonyx sp.n.3	non-embedder	femur thickness	0.0406585	0.285286	1.21851	0.841143	1.76516
Anisonyx sp.n.3	non-embedder	leg length	0.0063735	0.674953	0.896647	0.615092	1.30708
Anisonyx sp.n.3	non-embedder	tibia length	2.14047e-06	0.993878	-1.1972	-1.74723	-0.820323
Anisonyx sp.n.3	non-embedder	tibia thickness	0.0618773	0.184998	1.98829	1.37796	2.86895
Anisonyx sp.n.3	non-embedder	tarsi length	0.00121296	0.855027	1.37512	0.942442	2.00645
Chasme decora	non-embedder	femur length	0.00547886	0.763299	-1.80735	-2.95136	-1.10678
Chasme decora	non-embedder	femur thickness	0.197248	0.0567855	2.17727	1.39698	3.39341
Chasme decora	non-embedder	leg length	0.174867	0.074798	0.90907	0.579925	1.42503
Chasme decora	non-embedder	tibia length	0.517024	0.000521861	1.4768	1.04223	2.09258
Chasme decora	non-embedder	tibia thickness	0.0446111	0.38539	2.43704	1.50596	3.94378
Chasme decora	non-embedder	tarsi length	0.0961129	0.196456	1.14962	0.719162	1.83773
Denticnema decemlineata	embedder	femur length	0.297929	0.00180879	1.73924	1.2643	2.39259
Denticnema decemlineata	embedder	femur thickness	0.478959	2.2696e-05	2.56809	1.94886	3.38406
Denticnema decemlineata	embedder	leg length	0.716302	3.81373e-09	1.46208	1.19137	1.7943
Denticnema decemlineata	embedder	tibia length	0.572671	1.30605e-06	1.36029	1.05893	1.74739
Denticnema decemlineata	embedder	tibia thickness	0.474751	2.55e-05	1.90018	1.44044	2.50666
Denticnema decemlineata	embedder	tarsi length	0.571721	1.34829e-06	2.24796	1.74948	2.88847
Denticnema morbillosa	embedder	femur length	0.509036	9.61073e-06	1.4589	1.11589	1.90733
Denticnema morbillosa	embedder	femur thickness	0.566842	1.58611e-06	2.01897	1.56908	2.59786
Denticnema morbillosa	embedder	leg length	0.552627	2.52107e-06	1.28109	0.99163	1.65504
Denticnema morbillosa	embedder	tibia length	0.331251	0.000875905	1.30884	0.958523	1.7872
Denticnema morbillosa	embedder	tibia thickness	0.303856	0.00159321	1.95473	1.42281	2.68552
Denticnema morbillosa	embedder	tarsi length	0.385964	0.000248443	1.72584	1.27997	2.32701
Denticnema striata	embedder	femur length	0.271828	0.0183991	1.23716	0.820303	1.86586
Denticnema striata	embedder	femur thickness	0.227602	0.0334212	1.25106	0.819938	1.90888
Denticnema striata	embedder	leg length	0.389422	0.00327563	0.932907	0.639331	1.36129
Denticnema striata	embedder	tibia length	0.461965	0.000978724	1.01926	0.714189	1.45463
Denticnema striata	embedder	tibia thickness	0.591338	7.42423e-05	1.02164	0.748197	1.39502
Denticnema striata	embedder	tarsi length	0.172365	0.0687116	1.0687	0.69069	1.65358
Gymnoloma femorata	embedder	femur length	0.492479	4.19916e-10	1.13312	0.94064	1.36499
Gymnoloma femorata	embedder	femur thickness	0.236697	8.10183e-05	1.86998	1.48924	2.34806
Gymnoloma femorata	embedder	leg length	0.546195	1.55977e-11	0.790723	0.663016	0.943029
Gymnoloma femorata	embedder	tibia length	0.133947	0.0040301	1.13981	0.894615	1.45222
Gymnoloma femorata	embedder	tibia thickness	0.338426	1.08949e-06	1.4155	1.14487	1.7501
Gymnoloma femorata	embedder	tarsi length	0.16319	0.00136997	1.32384	1.04327	1.67987
Heterochelus alienatus	embedder	femur length	0.148923	0.0351829	1.63434	1.15177	2.3191
Heterochelus alienatus	embedder	femur thickness	0.344773	0.000647008	2.31154	1.69804	3.1467
Heterochelus alienatus	embedder	leg length	0.284294	0.00241417	1.30431	0.945318	1.79963
Heterochelus alienatus	embedder	tibia length	0.366711	0.00039125	1.62611	1.20058	2.20247
Heterochelus alienatus	embedder	tibia thickness	0.102914	0.0839061	2.3439	1.63709	3.35589
Heterochelus alienatus	embedder	tarsi length	0.125245	0.0550308	1.36316	0.956207	1.94329
Heterochelus kochi	embedder	femur length	0.598228	5.40138e-07	1.87564	1.47105	2.39151
Heterochelus kochi	embedder	femur thickness	0.337715	0.000758331	2.0279	1.48729	2.76501
Heterochelus kochi	embedder	leg length	0.524676	6.02689e-06	1.58964	1.22102	2.06954
Heterochelus kochi	embedder	tibia length	0.447796	5.27163e-05	1.7056	1.28412	2.26541
Heterochelus kochi	embedder	tibia thickness	0.14674	0.0366681	0.992693	0.699279	1.40922
Heterochelus kochi	embedder	tarsi length	0.346072	0.000628283	1.468	1.0787	1.99779
Heterochelus rufimanus	embedder	femur length	0.514885	1.11021e-10	1.9487	1.62434	2.33783
Heterochelus rufimanus	embedder	femur thickness	0.525509	5.78582e-11	2.16212	1.80582	2.58873
Heterochelus rufimanus	embedder	leg length	0.515958	1.04016e-10	1.55411	1.29569	1.86408
Heterochelus rufimanus	embedder	tibia length	0.385709	1.19455e-07	1.83167	1.4928	2.24746
Heterochelus rufimanus	embedder	tibia thickness	0.359506	4.14337e-07	1.23631	1.0033	1.52342
Heterochelus rufimanus	embedder	tarsi length	0.202842	0.000305234	1.70147	1.34841	2.14698
Heterochelus sp.n.17	embedder	femur length	0.770099	1.9434e-10	1.35713	1.12841	1.63222
Heterochelus sp.n.17	embedder	femur thickness	0.74168	1.01084e-09	1.88837	1.55304	2.29611
Heterochelus sp.n.17	embedder	leg length	0.777097	1.25546e-10	1.00347	0.836694	1.20349
Heterochelus sp.n.17	embedder	tibia length	0.48754	1.78478e-05	1.26172	0.959621	1.65891
Heterochelus sp.n.17	embedder	tibia thickness	0.755243	4.71138e-10	2.3753	1.1369	1.66368
Heterochelus sp.n.17	embedder	tarsi length	0.363849	0.000418143	1.06538	0.78606	1.44395
Ischnochelus emeritus	embedder	femur length	0.0966112	0.00501292	1.84732	1.49345	2.28504
Ischnochelus emeritus	embedder	femur thickness	0.147044	0.000446349	2.2409	1.82242	2.75547
Ischnochelus emeritus	embedder	leg length	0.135432	0.000783734	1.20437	0.978102	1.48297
Ischnochelus emeritus	embedder	tibia length	0.128516	0.00109376	1.78503	1.44849	2.19976
Ischnochelus emeritus	embedder	tibia thickness	0.112183	0.00239061	2.12037	1.7173	2.61803
Ischnochelus emeritus	embedder	tarsi length	0.0157412	0.267468	1.75133	1.40293	2.18626
Khoina haafi	non-embedder	femur length	0.0369083	0.309125	1.85608	1.28038	2.69064
Khoina haafi	non-embedder	femur thickness	0.259653	0.00402469	1.76578	1.273	2.44931
Khoina haafi	non-embedder	leg length	0.105078	0.0805373	1.46168	1.02133	2.0919
Khoina haafi	non-embedder	tibia length	0.194071	0.014832	2.03613	1.44797	2.86318
Khoina haafi	non-embedder	tibia thickness	0.319536	0.00113402	0.843355	1.34642	2.5237
Khoina haafi	non-embedder	tarsi length	0.0180392	0.479191	1.75413	1.20587	2.55166
Knysna sulcicollis	non-embedder	femur length	0.143613	0.0389029	0.651901	1.59468	3.21763
Knysna sulcicollis	non-embedder	femur thickness	0.307126	0.00148494	2.1669	1.57838	2.97485
Knysna sulcicollis	non-embedder	leg length	0.207892	0.0113327	1.43635	1.02434	2.01407
Knysna sulcicollis	non-embedder	tibia length	0.223423	0.00834714	1.38194	0.988711	1.93158
Knysna sulcicollis	non-embedder	tibia thickness	0.166456	0.0252145	0.993987	1.41013	2.81959
Knysna sulcicollis	non-embedder	tarsi length	0.0811283	0.127112	1.80317	1.2542	2.59244
Lepisia braunsi	non-embedder	femur length	0.298241	0.00389959	1.8558	1.31304	2.62294
Lepisia braunsi	non-embedder	femur thickness	0.0586064	0.233448	1.31988	0.886373	1.9654
Lepisia braunsi	non-embedder	leg length	0.431674	0.000266095	1.09829	0.803538	1.50118
Lepisia braunsi	non-embedder	tibia length	0.236197	0.0118285	1.59508	1.11247	2.28706
Lepisia braunsi	non-embedder	tibia thickness	0.211597	0.0180566	0.871517	0.892771	1.85575
Lepisia braunsi	non-embedder	tarsi length	0.270518	0.00645674	0.920278	0.646903	1.30918
Lepisia sp. n.1	non-embedder	femur length	0.160111	0.0284531	1.43888	1.01628	2.03723
Lepisia sp. n.1	non-embedder	femur thickness	0.208847	0.0111227	2.15489	1.53708	3.02104
Lepisia sp. n.1	non-embedder	leg length	0.228411	0.00756014	1.23498	0.88448	1.72436
Lepisia sp. n.1	non-embedder	tibia length	0.0334654	0.333243	1.69528	1.16871	2.45909
Lepisia sp. n.1	non-embedder	tibia thickness	0.135162	0.0456385	1.01677	1.41744	2.86952
Lepisia sp. n.1	non-embedder	tarsi length	0.226144	0.00790854	1.66665	1.19308	2.3282
Lepisia sp. n.3	non-embedder	femur length	0.214153	0.010023	1.42537	1.01782	1.99611
Lepisia sp. n.3	non-embedder	femur thickness	0.19297	0.0151519	1.56518	1.11282	2.20144
Lepisia sp. n.3	non-embedder	leg length	0.195101	0.0145388	0.926071	0.658705	1.30196
Lepisia sp. n.3	non-embedder	tibia length	0.0202705	0.452943	1.58765	1.09187	2.30855
Lepisia sp. n.3	non-embedder	tibia thickness	0.121231	0.0593589	1.5217	1.06659	2.17101
Lepisia sp. n.3	non-embedder	tarsi length	0.073278	0.147938	1.28693	0.893804	1.85298
Lepithrix kulzeri	non-embedder	femur length	0.199268	0.0134087	2.0439	1.45504	2.87106
Lepithrix kulzeri	non-embedder	femur thickness	0.0222248	0.431717	1.79601	1.2356	2.61058
Lepithrix kulzeri	non-embedder	leg length	0.200653	0.0130524	0.948818	0.67565	1.33243
Lepithrix kulzeri	non-embedder	tibia length	1.01192e-06	0.995791	1.48026	1.01427	2.16033
Lepithrix kulzeri	non-embedder	tibia thickness	0.0174634	0.486356	2.14115	1.47177	3.11496
Lepithrix kulzeri	non-embedder	tarsi length	0.0646333	0.175192	1.36942	0.949546	1.97495
Lepithrix longitarsis	non-embedder	femur length	0.109575	0.0853181	1.96377	1.35404	2.84806
Lepithrix longitarsis	non-embedder	femur thickness	0.396518	0.00033007	2.08562	1.53236	2.83864
Lepithrix longitarsis	non-embedder	leg length	0.100704	0.0998697	1.19335	0.821377	1.73378
Lepithrix longitarsis	non-embedder	tibia length	0.0580476	0.216811	1.4728	1.00528	2.15773
Lepithrix longitarsis	non-embedder	tibia thickness	0.232327	0.00939489	0.638579	1.86637	3.73028
Lepithrix longitarsis	non-embedder	tarsi length	0.00955424	0.620721	1.69095	1.14356	2.50035
Lepithrix sp.n.1	non-embedder	femur length	0.140566	0.037693	1.48328	1.05029	2.09478
Lepithrix sp.n.1	non-embedder	femur thickness	0.295429	0.00157702	1.42607	1.04216	1.9514
Lepithrix sp.n.1	non-embedder	leg length	0.288332	0.00184229	0.866472	0.632247	1.18747
Lepithrix sp.n.1	non-embedder	tibia length	0.161023	0.0252615	1.30463	0.927471	1.83515
Lepithrix sp.n.1	non-embedder	tibia thickness	0.121673	0.0544531	1.64618	1.16141	2.33328
Lepithrix sp.n.1	non-embedder	tarsi length	0.148714	0.03215	0.98468	0.698339	1.38843
Mauromecistoplia nieuwoudtvillensis	embedder	femur length	0.758791	3.83202e-10	1.42266	1.17766	1.71862
Mauromecistoplia nieuwoudtvillensis	embedder	femur thickness	0.724834	2.47366e-09	2.25999	1.84719	2.76503
Mauromecistoplia nieuwoudtvillensis	embedder	leg length	0.843081	8.87836e-13	1.14441	0.982295	1.33328
Mauromecistoplia nieuwoudtvillensis	embedder	tibia length	0.661017	4.78324e-08	1.28126	1.02462	1.60218
Mauromecistoplia nieuwoudtvillensis	embedder	tibia thickness	0.434105	7.52884e-05	1.22443	0.918722	1.63185
Mauromecistoplia nieuwoudtvillensis	embedder	tarsi length	0.68939	1.38023e-08	1.08463	0.875577	1.34359
Pachycnema alternans	embedder	femur length	0.33793	0.000754678	1.40757	1.03238	1.9191
Pachycnema alternans	embedder	femur thickness	0.251126	0.00478923	2.17573	1.5657	3.02343
Pachycnema alternans	embedder	leg length	0.355051	0.000512109	1.05747	0.778645	1.43615
Pachycnema alternans	embedder	tibia length	0.158161	0.0295272	1.65778	1.17043	2.34806
Pachycnema alternans	embedder	tibia thickness	0.33481	0.000809195	1.56919	1.15011	2.14098
Pachycnema alternans	embedder	tarsi length	0.132895	0.0476334	1.34352	0.943838	1.91244
Pachycnema calcarata	embedder	femur length	0.459781	0.000376984	1.36623	0.984523	1.89593
Pachycnema calcarata	embedder	femur thickness	0.714745	3.81305e-07	2.33719	1.83838	2.97133
Pachycnema calcarata	embedder	leg length	0.553224	4.74204e-05	1.18192	0.876587	1.59362
Pachycnema calcarata	embedder	tibia length	0.370359	0.00206019	1.23985	0.871318	1.76425
Pachycnema calcarata	embedder	tibia thickness	0.796481	1.04884e-08	1.53246	1.25051	1.87798
Pachycnema calcarata	embedder	tarsi length	0.403897	0.00111886	1.46619	1.03987	2.0673
Pachycnema calviniana	embedder	femur length	0.182482	2.68084e-05	1.57017	1.29795	1.89947
Pachycnema calviniana	embedder	femur thickness	0.216461	3.83209e-06	1.40381	1.16503	1.69152
Pachycnema calviniana	embedder	leg length	0.2822	7.1749e-08	1.02116	0.854196	1.22076
Pachycnema calviniana	embedder	tibia length	0.166278	6.62891e-05	1.19652	0.98725	1.45014
Pachycnema calviniana	embedder	tibia thickness	0.205314	7.30841e-06	1.21542	1.00737	1.46643
Pachycnema calviniana	embedder	tarsi length	0.143575	0.000230722	1.29243	1.06366	1.57042
Pachycnema crassipes	embedder	femur length	0.176974	1.50952e-08	1.34478	1.17026	1.54532
Pachycnema crassipes	embedder	femur thickness	0.104766	1.98265e-05	1.44713	1.25189	1.67282
Pachycnema crassipes	embedder	leg length	0.207973	5.89068e-10	0.920749	0.803369	1.05528
Pachycnema crassipes	embedder	tibia length	0.19324	2.79017e-09	1.214	1.05791	1.39312
Pachycnema crassipes	embedder	tibia thickness	0.193657	2.67103e-09	1.55378	1.35405	1.78298
Pachycnema crassipes	embedder	tarsi length	0.0423559	0.00762493	0.993976	0.855645	1.15467
Pachycnema flavolineata	embedder	femur length	0.176416	0.0208426	1.65688	1.17408	2.33824
Pachycnema flavolineata	embedder	femur thickness	0.486522	1.83675e-05	1.66123	1.26314	2.18478
Pachycnema flavolineata	embedder	leg length	0.429522	8.46794e-05	1.29302	0.969096	1.72522
Pachycnema flavolineata	embedder	tibia length	0.621233	2.32609e-07	1.51166	1.19383	1.91412
Pachycnema flavolineata	embedder	tibia thickness	0.462792	3.53415e-05	1.59083	1.20225	2.10499
Pachycnema flavolineata	embedder	tarsi length	0.2104	0.0107894	1.49692	1.06809	2.09793
Pachycnema murina	embedder	femur length	0.0119516	0.565241	1.59024	1.092	2.31582
Pachycnema murina	embedder	femur thickness	0.0515492	0.227599	1.36931	0.947154	1.97962
Pachycnema murina	embedder	leg length	0.0440709	0.265518	1.05772	0.730614	1.53128
Pachycnema murina	embedder	tibia length	0.00130213	0.84985	1.21884	0.835349	1.77839
Pachycnema murina	embedder	tibia thickness	0.02631	0.391795	1.48465	1.02216	2.15639
Pachycnema murina	embedder	tarsi length	0.0810946	0.127194	1.3914	0.967786	2.00044
Peritrichia hessei	non-embedder	femur length	0.270503	0.00321883	2.59394	1.8744	3.58969
Peritrichia hessei	non-embedder	femur thickness	0.119548	0.0612746	1.99188	1.39569	2.84275
Peritrichia hessei	non-embedder	leg length	0.231544	0.00710274	1.47384	1.05624	2.05653
Peritrichia hessei	non-embedder	tibia length	0.00261448	0.78844	-1.96947	-2.87294	-1.35012
Peritrichia hessei	non-embedder	tibia thickness	0.0658814	0.17094	1.87698	1.30179	2.70632
Peritrichia hessei	non-embedder	tarsi length	0.071655	0.152683	2.7645	1.91942	3.98166
Peritrichia pistrinaria	non-embedder	femur length	0.00676063	0.44898	1.69876	1.37244	2.10267
Peritrichia pistrinaria	non-embedder	femur thickness	0.0431046	0.0536578	1.65016	1.33836	2.03459
Peritrichia pistrinaria	non-embedder	leg length	0.0143432	0.269203	1.26748	1.02483	1.56758
Peritrichia pistrinaria	non-embedder	tibia length	0.00509159	0.511329	-2.1113	-2.61375	-1.70543
Peritrichia pistrinaria	non-embedder	tibia thickness	0.137982	0.000396709	1.03832	1.26084	1.87687
Peritrichia pistrinaria	non-embedder	tarsi length	0.0783843	0.00862983	1.50997	1.22938	1.8546
Peritrichia ypsilon	non-embedder	femur length	0.0209118	0.445808	1.10732	0.761622	1.60993
Peritrichia ypsilon	non-embedder	femur thickness	0.116588	0.064794	1.7508	1.22607	2.50011
Peritrichia ypsilon	non-embedder	leg length	0.00275815	0.782839	-0.880699	-1.28468	-0.603757
Peritrichia ypsilon	non-embedder	tibia length	0.0317815	0.345919	-1.46143	-2.12053	-1.00719
Peritrichia ypsilon	non-embedder	tibia thickness	0.0715402	0.153024	1.84896	1.28372	2.66308
Peritrichia ypsilon	non-embedder	tarsi length	0.00135953	0.846615	-1.27421	-1.85916	-0.873305
Platychelus sp.n.6	embedder	femur length	0.203975	0.0180386	1.70731	1.19151	2.4464
Platychelus sp.n.6	embedder	femur thickness	0.189482	0.0232477	1.30759	0.909702	1.8795
Platychelus sp.n.6	embedder	leg length	0.420744	0.000252642	1.21329	0.891153	1.65188
Platychelus sp.n.6	embedder	tibia length	0.293646	0.00350501	1.09057	0.776532	1.53162
Platychelus sp.n.6	embedder	tibia thickness	0.102375	0.103739	1.31835	0.900696	1.92968
Platychelus sp.n.6	embedder	tarsi length	0.384653	0.000558723	1.47413	1.07286	2.0255
Scelophysa pruinosa	embedder	femur length	0.165757	0.0255528	1.6724	1.18254	2.36518
Scelophysa pruinosa	embedder	femur thickness	0.278547	0.00272301	1.70114	1.23139	2.35008
Scelophysa pruinosa	embedder	leg length	0.212843	0.0102843	1.25275	0.894317	1.75484
Scelophysa pruinosa	embedder	tibia length	0.0897224	0.107816	1.37014	0.954562	1.96665
Scelophysa pruinosa	embedder	tibia thickness	0.0500134	0.234841	1.53437	1.06103	2.21889
Scelophysa pruinosa	embedder	tarsi length	0.218184	0.0092579	1.33896	0.956915	1.87353
Scelophysa strandfonteinensis	embedder	femur length	0.0141796	0.648966	1.40231	0.831748	2.36425
Scelophysa strandfonteinensis	embedder	femur thickness	0.123612	0.1664	1.74135	1.06172	2.85602
Scelophysa strandfonteinensis	embedder	leg length	0.164796	0.105921	1.08039	0.665958	1.75272
Scelophysa strandfonteinensis	embedder	tibia length	0.156366	0.116171	1.31961	0.81158	2.14566
Scelophysa strandfonteinensis	embedder	tibia thickness	0.0325286	0.488497	1.46226	0.871211	2.45429
Scelophysa strandfonteinensis	embedder	tarsi length	0.111115	0.191048	1.90176	1.15576	3.12926
Scelophysa trimeni	embedder	femur length	0.199085	3.26315e-07	1.26965	1.0793	1.49358
Scelophysa trimeni	embedder	femur thickness	0.30931	4.26433e-11	1.95267	1.67911	2.27079
Scelophysa trimeni	embedder	leg length	0.191307	5.87884e-07	0.852191	0.723861	1.00327
Scelophysa trimeni	embedder	tibia length	0.0309646	0.0545452	1.12888	0.944329	1.34949
Scelophysa trimeni	embedder	tibia thickness	0.422068	9.96115e-16	1.29684	1.12951	1.48896
Scelophysa trimeni	embedder	tarsi length	0.103593	0.000337381	1.0493	0.883711	1.24593
Scelophysa ulrichi	embedder	femur length	0.0574109	0.202209	1.14476	0.792696	1.65318
Scelophysa ulrichi	embedder	femur thickness	0.367958	0.000380046	1.31328	0.969894	1.77824
Scelophysa ulrichi	embedder	leg length	0.214405	0.00997332	0.902788	0.644693	1.26421
Scelophysa ulrichi	embedder	tibia length	0.140614	0.0411719	0.878561	0.618135	1.24871
Scelophysa ulrichi	embedder	tibia thickness	0.339389	0.000730404	1.51385	1.1107	2.06333
Scelophysa ulrichi	embedder	tarsi length	0.176449	0.0208292	1.55503	1.10191	2.19449
Stigmatoplia ornata	embedder	femur length	0.0748313	0.167382	1.19905	0.81467	1.76479
Stigmatoplia ornata	embedder	femur thickness	0.604519	1.82813e-06	2.25002	1.74144	2.90712
Stigmatoplia ornata	embedder	leg length	0.337426	0.00148761	0.960174	0.690773	1.33464
Stigmatoplia ornata	embedder	tibia length	0.359052	0.000957366	1.30195	0.941574	1.80026
Stigmatoplia ornata	embedder	tibia thickness	0.27912	0.00461472	1.97398	1.40086	2.78158
Stigmatoplia ornata	embedder	tarsi length	0.182207	0.0263823	1.36069	0.945175	1.95888
